# Supplementary material for: Iron-catalyzed hydrogen atom transfer induced cyclization of 1,6-enynes for the synthesis of ketoximes: a combined experimental and computational study
Source: Royal Society of Chemistry journal article supplement (doi:10.1039/d0qo01341b), 2020-12-10
Supplement: d0qo01341b2.pdf [file d0qo01341b2.pdf]

## Computational details

All density functional theory (DFT) calculations were performed using Gaussian 16.<sup>1</sup> The popular B3LYP<sup>2-3</sup> method was chosen as the functional for all calculations. Geometry optimizations were carried out with Ahlrichs def2-SVP<sup>4</sup> basis set in gas phase. Frequency calculations at the same level were carried out to confirm each stationary point to be either a minimum or a transition state geometry. The single-point energies were calculated at the level of B3LYP-D3<sup>5</sup>/def2-TZVP<sup>6</sup> with Truhlar's SMD solvation model<sup>7</sup>. Tetrahydrofuran was chosen as the solvent to be consistent with the experiment. The electronic energies with ZPE and thermal free energies (at 298.15K) corrections are shown in kcal/mol.

**Table S1.** The free energies of different spin states for Fe species. The free energy of sextet and quintet spin state is chosen as the reference point for each kind of Fe species. (kcal/mol)

|                                        |         |         |         |
|----------------------------------------|---------|---------|---------|
| spin state                             | doublet | quartet | sextet  |
| <b>Fe(acac)<sub>3</sub></b>            | 14.1    | 16.6    | 0.0     |
| <b>FeH(acac)<sub>2</sub></b>           | 3.2     | 0.6     | 0.0     |
| <b>TS1</b>                             | 1.1     | -4.5    | 0.0     |
| <b>FeO<i>t</i>Bu(acac)<sub>2</sub></b> | 28.8    | 17.2    | 0.0     |
| spin state                             | singlet | triplet | quintet |
| <b>Fe(acac)<sub>2</sub></b>            | 42.4    | 18.4    | 0.0     |

Another two popular DFT functionals M06-2X<sup>8</sup> and  $\omega$ B97xD<sup>9</sup> were also used to challenge the reliability of our computations for the energy difference between (**Z**)-**2a** and (**E**)-**2a**, and all the computational results are consistent with each other (see **Figure S1**). These results confirm that thermodynamics determines the selectivity.

|                                  |                                                                                   |                                                                                    |
|----------------------------------|-----------------------------------------------------------------------------------|------------------------------------------------------------------------------------|
|                                  | 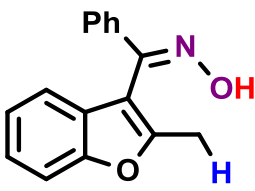 |  |
|                                  | <b>(Z)-2a</b>                                                                     | <b>(E)-2a</b>                                                                      |
| <b>B3LYP-D3</b>                  | 0.0                                                                               | 1.0                                                                                |
| <b>M06-2X</b>                    | 0.0                                                                               | 1.3                                                                                |
| <b><math>\omega</math>B97-xD</b> | 0.0                                                                               | 1.1                                                                                |

**Figure S1.** The energy differences between **(Z)-2a** and **(E)-2a** by different DFT functionals. The free energy of **(Z)-2a** is chosen as the reference point. (kcal/mol)

Without NO radical catalyzing, the energy barrier for the isomerization is more than 50 kcal/mol (see **Figure S2**), this is in accordance with previous theoretical work.<sup>10</sup> To the best of our knowledge, it is the first time to locate the transition state of NO-catalyzed *Z/E* oxime isomerization by computations.

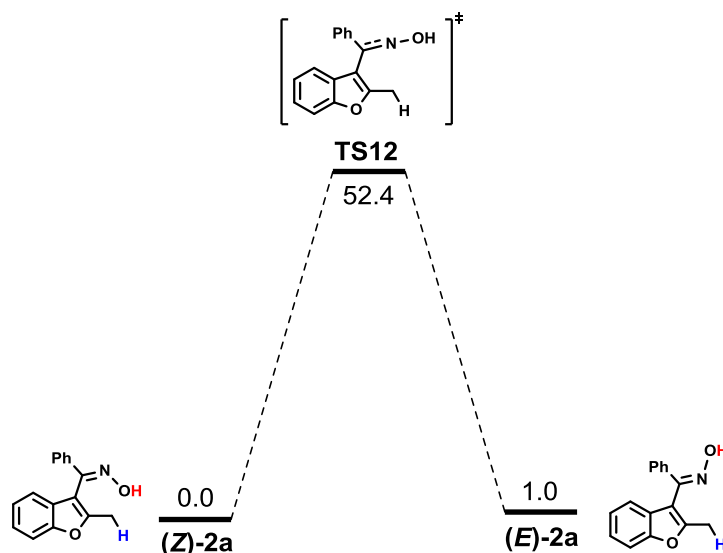

**Figure S2.** The energy barrier for the *Z/E* Oxime isomerization without NO catalyst. The free energy of **(Z)-2a** is chosen as the reference point. (kcal/mol)

## Reference

1. Frisch, M. J.; Trucks, G. W.; Schlegel, H. B.; Scuseria, G. E.; Robb, M. A.; Cheeseman, J.

R.; Scalmani, G.; Barone, V.; Petersson, G. A.; Nakatsuji, H.; Li, X.; Caricato, M.; Marenich, A. V.; Bloino, J.; Janesko, B. G.; Gomperts, R.; Mennucci, B.; Hratchian, H. P.; Ortiz, J. V.; Izmaylov, A. F.; Sonnenberg, J. L.; Williams; Ding, F.; Lipparini, F.; Egidi, F.; Goings, J.; Peng, B.; Petrone, A.; Henderson, T.; Ranasinghe, D.; Zakrzewski, V. G.; Gao, J.; Rega, N.; Zheng, G.; Liang, W.; Hada, M.; Ehara, M.; Toyota, K.; Fukuda, R.; Hasegawa, J.; Ishida, M.; Nakajima, T.; Honda, Y.; Kitao, O.; Nakai, H.; Vreven, T.; Throssell, K.; Montgomery Jr., J. A.; Peralta, J. E.; Ogliaro, F.; Bearpark, M. J.; Heyd, J. J.; Brothers, E. N.; Kudin, K. N.; Staroverov, V. N.; Keith, T. A.; Kobayashi, R.; Normand, J.; Raghavachari, K.; Rendell, A. P.; Burant, J. C.; Iyengar, S. S.; Tomasi, J.; Cossi, M.; Millam, J. M.; Klene, M.; Adamo, C.; Cammi, R.; Ochterski, J. W.; Martin, R. L.; Morokuma, K.; Farkas, O.; Foresman, J. B.; Fox, D. J. *Gaussian 16 Rev. A.03*, Wallingford, CT, 2016.

2. Lee, C.; Yang, W.; Parr, R. G. Development of the Colle-Salvetti correlation-energy formula into a functional of the electron density. *Physical Review B* **1988**, *37*(2), 785-789.
3. Becke, A. D. Density-functional thermochemistry. III. The role of exact exchange. *The Journal of Chemical Physics* **1993**, *98* (7), 5648-5652.
4. Weigend, F.; Ahlrichs, R. Balanced basis sets of split valence, triple zeta valence and quadruple zeta valence quality for H to Rn: Design and assessment of accuracy. *PCCP* **2005**, *7*(18), 3297-3305.
5. Grimme, S.; Antony, J.; Ehrlich, S.; Krieg, H. A consistent and accurate ab initio parametrization of density functional dispersion correction (DFT-D) for the 94 elements H-Pu. *The Journal of Chemical Physics* **2010**, *132*(15), 154104.
6. Furche, F.; Ahlrichs, R.; Hättig, C.; Klopper, W.; Sierka, M.; Weigend, F. *Turbomole*. *Wiley*

*Interdisciplinary Reviews: Computational Molecular Science* **2014**, *4*(2), 91-100.

7. Marenich, A. V.; Cramer, C. J.; Truhlar, D. G. Universal Solvation Model Based on Solute Electron Density and on a Continuum Model of the Solvent Defined by the Bulk Dielectric Constant and Atomic Surface Tensions. *The Journal of Physical Chemistry B* **2009**, *113* (18), 6378-6396.
8. Zhao, Y.; Truhlar, D. G. The M06 suite of density functionals for main group thermochemistry, thermochemical kinetics, noncovalent interactions, excited states, and transition elements: two new functionals and systematic testing of four M06-class functionals and 12 other functionals. *Theor. Chem. Acc.* **2008**, *120*(1), 215-241.
9. Chai, J.-D.; Head-Gordon, M. Long-range corrected hybrid density functionals with damped atom-atom dispersion corrections. *Phys. Chem. Chem. Phys.* **2008**, *10* (44), 6615-6620.
10. Bohle, D. S.; Chua, Z.; Perepichka, I.; Rosadiuk, K. E/Z Oxime Isomerism in PhC(NO<sub>2</sub>)CN. *Chemistry – A European Journal* **2013**, *19*(13), 4223-4229.

## Cartesian Coordinates

Fe(acac)<sub>3</sub> (doublet)

|    |             |             |             |
|----|-------------|-------------|-------------|
| Fe | 0.08200700  | -0.00024900 | 0.00006400  |
| O  | -1.28785800 | 0.55941100  | -1.21488200 |
| C  | -1.98764400 | 1.61412500  | -1.09324900 |
| C  | -3.07646100 | 1.77447100  | -2.12958500 |
| H  | -3.71863500 | 0.87958600  | -2.12353300 |
| H  | -3.69078000 | 2.66941500  | -1.96447300 |
| H  | -2.61620300 | 1.82978600  | -3.12944700 |
| C  | -1.80000500 | 2.60584300  | -0.11381300 |
| H  | -2.47035400 | 3.46475000  | -0.11757000 |
| C  | -0.73913700 | 2.59569400  | 0.81336900  |
| O  | 0.13100100  | 1.67816600  | 0.92036700  |

|   |             |             |             |
|---|-------------|-------------|-------------|
| C | -0.56001400 | 3.75710700  | 1.76414100  |
| H | -0.61322200 | 3.38454900  | 2.79977100  |
| H | 0.44669900  | 4.18382100  | 1.62997900  |
| H | -1.31247700 | 4.54373400  | 1.62080500  |
| O | -1.28846600 | -0.55721600 | 1.21532000  |
| C | -1.99098100 | -1.61019800 | 1.09395800  |
| C | -3.07952900 | -1.76795900 | 2.13093300  |
| H | -3.72037900 | -0.87211600 | 2.12434900  |
| H | -3.69530800 | -2.66209400 | 1.96686700  |
| H | -2.61891000 | -1.82305000 | 3.13062800  |
| C | -1.80645200 | -2.60203200 | 0.11408600  |
| H | -2.47899900 | -3.45922000 | 0.11780200  |
| C | -0.74586000 | -2.59416200 | -0.81347900 |
| O | 0.12682500  | -1.67901700 | -0.91982200 |
| C | -0.57004200 | -3.75543200 | -1.76500100 |
| H | -0.62217900 | -3.38194200 | -2.80034800 |
| H | 0.43547400  | -4.18509600 | -1.63122900 |
| H | -1.32473000 | -4.54001800 | -1.62221400 |
| O | 1.41104200  | 0.63238100  | -1.24273200 |
| C | 2.67003400  | 0.55881500  | -1.10433000 |
| C | 3.46851600  | 1.13439300  | -2.25216500 |
| H | 3.16866900  | 2.18224700  | -2.41248400 |
| H | 4.55213300  | 1.08503700  | -2.08222500 |
| H | 3.21844000  | 0.58639800  | -3.17490600 |
| C | 3.33744800  | -0.00308600 | -0.00045100 |
| H | 4.42678000  | -0.00396100 | -0.00061900 |
| C | 2.66945600  | -0.56411100 | 1.10366200  |
| O | 1.41051300  | -0.63572800 | 1.24244700  |
| C | 3.46755200  | -1.14099400 | 2.25113900  |
| H | 3.21961700  | -0.59186400 | 3.17378600  |
| H | 3.16530600  | -2.18802500 | 2.41225900  |
| H | 4.55114400  | -1.09430200 | 2.08026200  |

**Fe(acac)<sub>3</sub> (quartet)**

|    |             |             |             |
|----|-------------|-------------|-------------|
| Fe | -0.14221400 | -0.00181200 | -0.00024900 |
| O  | -0.10421900 | 1.88913700  | -0.86096300 |
| C  | 0.80279700  | 2.75368300  | -0.71846100 |
| C  | 0.71384000  | 3.96951000  | -1.61695100 |
| H  | -0.26447200 | 4.45492300  | -1.47071700 |
| H  | 1.51419200  | 4.69952300  | -1.43562100 |
| H  | 0.75101300  | 3.64028100  | -2.66797600 |
| C  | 1.86031800  | 2.65931600  | 0.21956300  |
| H  | 2.58424800  | 3.47253800  | 0.26577900  |
| C  | 1.99042600  | 1.61190700  | 1.14296700  |

|   |             |             |             |
|---|-------------|-------------|-------------|
| O | 1.22719600  | 0.59312500  | 1.22618100  |
| C | 3.09760400  | 1.64654100  | 2.17314700  |
| H | 2.65297900  | 1.64188700  | 3.18140800  |
| H | 3.70185600  | 0.72928600  | 2.08735600  |
| H | 3.74689200  | 2.52562600  | 2.06647200  |
| O | -1.48546700 | 0.55240500  | 1.27415800  |
| C | -2.74754600 | 0.49020700  | 1.13157100  |
| C | -3.54158700 | 1.01280900  | 2.30553100  |
| H | -3.25174600 | 2.05789500  | 2.49900700  |
| H | -4.62588900 | 0.95626100  | 2.14362800  |
| H | -3.27363100 | 0.43590300  | 3.20509700  |
| C | -3.41494300 | -0.01388300 | 0.00120600  |
| H | -4.50417000 | -0.01713200 | 0.00144400  |
| C | -2.74500400 | -0.51473700 | -1.12916700 |
| O | -1.48268400 | -0.56945600 | -1.27219700 |
| C | -3.53647700 | -1.04323800 | -2.30223200 |
| H | -3.27294800 | -0.46514000 | -3.20234000 |
| H | -3.23994300 | -2.08652400 | -2.49528100 |
| H | -4.62100700 | -0.99370600 | -2.13956400 |
| O | 1.22977900  | -0.58336800 | -1.22922000 |
| C | 2.00537300  | -1.59288000 | -1.14556700 |
| C | 3.11111000  | -1.61584900 | -2.17756300 |
| H | 3.70384500  | -0.69082900 | -2.09495500 |
| H | 3.77158100  | -2.48645700 | -2.07004000 |
| H | 2.66472600  | -1.61916600 | -3.18506300 |
| C | 1.88917600  | -2.64024700 | -0.22041600 |
| H | 2.62262800  | -3.44490300 | -0.26649900 |
| C | 0.83383000  | -2.74599700 | 0.71898700  |
| O | -0.08305500 | -1.89204600 | 0.86150300  |
| C | 0.76013000  | -3.96191500 | 1.61873500  |
| H | 0.79357600  | -3.63118100 | 2.66940500  |
| H | -0.21217700 | -4.45948100 | 1.47328700  |
| H | 1.56932900  | -4.68222100 | 1.43785400  |

Fe(acac)<sub>3</sub> (sextet)

|    |             |             |             |
|----|-------------|-------------|-------------|
| Fe | 0.00077000  | -0.00239300 | 0.00083200  |
| O  | -0.92547600 | 1.37132200  | -1.15985000 |
| C  | -1.00858900 | 2.63271600  | -1.04894800 |
| C  | -1.78528500 | 3.33391600  | -2.14048700 |
| H  | -1.31052800 | 3.12056500  | -3.11187400 |
| H  | -2.80296700 | 2.91394800  | -2.18591800 |
| H  | -1.84404800 | 4.42069500  | -1.99402600 |
| C  | -0.43709200 | 3.38337800  | -0.00230600 |
| H  | -0.57694300 | 4.46410900  | -0.00326500 |

|   |             |             |             |
|---|-------------|-------------|-------------|
| C | 0.30652300  | 2.80474700  | 1.04543400  |
| O | 0.54736800  | 1.56396100  | 1.15838700  |
| C | 0.87888100  | 3.68238800  | 2.13563200  |
| H | 0.66073500  | 4.74827400  | 1.98633600  |
| H | 0.47217100  | 3.35814700  | 3.10722300  |
| H | 1.96964800  | 3.53382800  | 2.18300900  |
| O | -1.62346600 | -0.31237000 | 1.16567300  |
| C | -2.58206400 | -1.13623700 | 1.05300100  |
| C | -3.62500000 | -1.07723100 | 2.14623100  |
| H | -3.13916100 | -1.27250900 | 3.11595600  |
| H | -4.03648400 | -0.05638900 | 2.19760900  |
| H | -4.44301900 | -1.79460700 | 1.99716500  |
| C | -2.71863500 | -2.06611600 | 0.00317100  |
| H | -3.58777700 | -2.72346900 | 0.00279500  |
| C | -1.78538400 | -2.18835800 | -1.04549100 |
| O | -0.73149500 | -1.49042100 | -1.15728200 |
| C | -2.01101000 | -3.20901000 | -2.13807500 |
| H | -2.92512200 | -3.79949100 | -1.99064500 |
| H | -2.06329700 | -2.68949500 | -3.10857900 |
| H | -1.14153000 | -3.88413600 | -2.18625600 |
| O | 1.64956500  | 0.10692000  | -1.16603200 |
| C | 2.78504300  | -0.44842000 | -1.05391200 |
| C | 3.77747400  | -0.13145400 | -2.14981900 |
| H | 3.35419400  | -0.44418600 | -3.11809200 |
| H | 3.91939800  | 0.95991200  | -2.20345900 |
| H | 4.74971700  | -0.62017000 | -2.00184900 |
| C | 3.15361500  | -1.31107500 | -0.00245900 |
| H | 4.16036400  | -1.72819600 | -0.00299200 |
| C | 2.28356800  | -1.66146100 | 1.04908700  |
| O | 1.08802500  | -1.25130300 | 1.16222000  |
| C | 2.76139600  | -2.58903100 | 2.14346000  |
| H | 3.79423900  | -2.93113800 | 1.99451500  |
| H | 2.68384000  | -2.06993900 | 3.11250400  |
| H | 2.08973800  | -3.46092400 | 2.19616100  |

## PMHS

|    |             |            |             |
|----|-------------|------------|-------------|
| Si | 0.02385500  | 1.48174900 | 0.49861800  |
| H  | -0.22600900 | 1.68355100 | 1.95612000  |
| C  | -0.06451900 | 3.10285900 | -0.42738200 |
| H  | -1.04459000 | 3.58712200 | -0.28542000 |
| H  | 0.71525000  | 3.79744300 | -0.07491700 |
| H  | 0.08411900  | 2.94113800 | -1.50750500 |
| O  | 1.53285000  | 0.83650500 | 0.31328600  |
| O  | -1.11054500 | 0.43333400 | -0.09969000 |

|    |             |             |             |
|----|-------------|-------------|-------------|
| Si | 2.53103300  | -0.46245700 | -0.03922200 |
| Si | -2.50683100 | -0.48772900 | -0.03504800 |
| C  | -3.96546500 | 0.59796100  | -0.52732100 |
| H  | -4.09357300 | 1.43813000  | 0.17527900  |
| H  | -3.82040000 | 1.02142100  | -1.53484400 |
| H  | -4.90667500 | 0.02280800  | -0.53620800 |
| C  | -2.30001100 | -1.90381800 | -1.25685500 |
| H  | -1.44039500 | -2.53918400 | -0.98693800 |
| H  | -3.19707800 | -2.54493800 | -1.28325400 |
| H  | -2.12821700 | -1.52165700 | -2.27653300 |
| C  | -2.73881900 | -1.14655700 | 1.71549200  |
| H  | -3.65063400 | -1.76281900 | 1.79038900  |
| H  | -1.88484200 | -1.77267500 | 2.02282100  |
| H  | -2.82981000 | -0.32360700 | 2.44354700  |
| C  | 4.29880000  | 0.11969200  | 0.23077100  |
| H  | 4.53511900  | 0.97619900  | -0.42172800 |
| H  | 4.45371200  | 0.44027100  | 1.27405100  |
| H  | 5.02341000  | -0.68247600 | 0.01186800  |
| C  | 2.11924700  | -1.89194300 | 1.11899000  |
| H  | 1.07675300  | -2.22471100 | 0.98355800  |
| H  | 2.77487200  | -2.75946300 | 0.93378700  |
| H  | 2.24369900  | -1.59528000 | 2.17357200  |
| C  | 2.26058800  | -0.97068800 | -1.83286900 |
| H  | 2.89694800  | -1.82824400 | -2.10921900 |
| H  | 1.21021000  | -1.25797400 | -2.00428600 |
| H  | 2.49796000  | -0.14067400 | -2.51874200 |

FeH(acac)<sub>2</sub> (doublet)

|    |             |             |             |
|----|-------------|-------------|-------------|
| Fe | -0.00372000 | 0.00007300  | -0.07888400 |
| O  | 1.30316200  | 1.36350100  | 0.10774800  |
| C  | 2.56734100  | 1.23391000  | 0.01571400  |
| C  | 3.35097200  | 2.52409900  | 0.05932800  |
| H  | 3.13082600  | 3.05138000  | 1.00164500  |
| H  | 4.43437200  | 2.36569900  | -0.02319300 |
| H  | 3.01291300  | 3.18117400  | -0.75798700 |
| C  | 3.23587600  | -0.00006100 | -0.08306100 |
| H  | 4.32363400  | -0.00011700 | -0.14940100 |
| C  | 2.56722800  | -1.23394900 | 0.01584700  |
| O  | 1.30303700  | -1.36340400 | 0.10809200  |
| C  | 3.35068000  | -2.52425100 | 0.05917800  |
| H  | 3.12888300  | -3.05271100 | 1.00043200  |
| H  | 3.01387100  | -3.18026200 | -0.75952800 |
| H  | 4.43422400  | -2.36589500 | -0.02148000 |
| O  | -1.30317400 | -1.36904200 | -0.00831500 |



|   |             |             |             |
|---|-------------|-------------|-------------|
| C | -2.57099800 | -1.23558500 | 0.01912500  |
| C | -3.35125300 | -2.52806100 | 0.04699000  |
| H | -3.03098300 | -3.12790400 | 0.91393700  |
| H | -4.43643900 | -2.36788400 | 0.09506900  |
| H | -3.10893900 | -3.11682500 | -0.85251600 |
| C | -3.24354200 | -0.00002700 | 0.02471800  |
| H | -4.33315000 | -0.00005500 | 0.04177000  |
| C | -2.57107200 | 1.23557400  | 0.01900900  |
| O | -1.30326600 | 1.36911600  | -0.00862400 |
| C | -3.35141200 | 2.52799700  | 0.04711400  |
| H | -3.03235900 | 3.12692700  | 0.91515800  |
| H | -3.10787700 | 3.11772400  | -0.85141400 |
| H | -4.43665400 | 2.36773900  | 0.09364600  |
| H | 0.20338800  | -0.00012600 | -1.53012300 |

FeH(acac)<sub>2</sub> (quartet)

|    |             |             |             |
|----|-------------|-------------|-------------|
| Fe | -0.00001800 | 0.00002000  | 0.80602600  |
| O  | 1.64041100  | -1.00000400 | 0.91888200  |
| C  | 2.75243400  | -0.79013700 | 0.33591700  |
| C  | 3.81157800  | -1.83652900 | 0.59300500  |
| H  | 3.42172500  | -2.82449000 | 0.30028600  |
| H  | 4.74612400  | -1.63645400 | 0.05262900  |
| H  | 4.01813600  | -1.88385800 | 1.67443600  |
| C  | 3.03940800  | 0.31299100  | -0.49076500 |
| H  | 4.03466800  | 0.38160200  | -0.92904700 |
| C  | 2.11205500  | 1.33617900  | -0.76952700 |
| O  | 0.92681300  | 1.37487600  | -0.30988600 |
| C  | 2.50777000  | 2.48968300  | -1.66177600 |
| H  | 1.81653600  | 2.53590100  | -2.51883200 |
| H  | 2.38530600  | 3.43316700  | -1.10564800 |
| H  | 3.53976200  | 2.41347800  | -2.02912000 |
| O  | -1.64043300 | 1.00006800  | 0.91886800  |
| C  | -2.75243600 | 0.79014300  | 0.33585400  |
| C  | -3.81164400 | 1.83646000  | 0.59299400  |
| H  | -3.42164900 | 2.82454300  | 0.30089400  |
| H  | -4.74598300 | 1.63665600  | 0.05215400  |
| H  | -4.01866200 | 1.88327500  | 1.67436200  |
| C  | -3.03935500 | -0.31297400 | -0.49084700 |
| H  | -4.03459300 | -0.38157500 | -0.92918100 |
| C  | -2.11201400 | -1.33620500 | -0.76952000 |
| O  | -0.92680500 | -1.37489900 | -0.30980100 |
| C  | -2.50769600 | -2.48971300 | -1.66177200 |
| H  | -1.81630200 | -2.53608200 | -2.51868900 |
| H  | -2.38548900 | -3.43317700 | -1.10555700 |

|   |             |             |             |
|---|-------------|-------------|-------------|
| H | -3.53960400 | -2.41338300 | -2.02933100 |
| H | 0.00001700  | 0.00015000  | 2.32808600  |

**FeH(acac)<sub>2</sub> (sextet)**

|    |             |             |             |
|----|-------------|-------------|-------------|
| Fe | 0.00003700  | 0.00000900  | 0.68615700  |
| O  | 1.36722800  | -1.36019500 | 0.14359700  |
| C  | 2.58920900  | -1.23593000 | -0.18701500 |
| C  | 3.34489900  | -2.52743400 | -0.39121700 |
| H  | 2.83322500  | -3.12686500 | -1.16129400 |
| H  | 4.39086100  | -2.36860500 | -0.68510500 |
| H  | 3.31079700  | -3.11437000 | 0.54085300  |
| C  | 3.24016600  | 0.00002600  | -0.36520800 |
| H  | 4.29089700  | 0.00003600  | -0.65366600 |
| C  | 2.58915300  | 1.23597000  | -0.18714000 |
| O  | 1.36716900  | 1.36021500  | 0.14347200  |
| C  | 3.34481300  | 2.52748800  | -0.39136500 |
| H  | 2.83306000  | 3.12693800  | -1.16137100 |
| H  | 3.31079500  | 3.11439500  | 0.54072900  |
| H  | 4.39075200  | 2.36867800  | -0.68534500 |
| O  | -1.36749000 | 1.36025000  | 0.14467900  |
| C  | -2.58913000 | 1.23594400  | -0.18716100 |
| C  | -3.34491600 | 2.52742300  | -0.39119000 |
| H  | -2.83086600 | 3.12897800  | -1.15798400 |
| H  | -4.38976700 | 2.36858600  | -0.68899500 |
| H  | -3.31458500 | 3.11221400  | 0.54238800  |
| C  | -3.23982500 | -0.00003600 | -0.36619300 |
| H  | -4.29026900 | -0.00005200 | -0.65569900 |
| C  | -2.58908500 | -1.23599300 | -0.18718800 |
| O  | -1.36743400 | -1.36026300 | 0.14463400  |
| C  | -3.34478400 | -2.52749700 | -0.39137800 |
| H  | -2.83074100 | -3.12889700 | -1.15830100 |
| H  | -3.31434600 | -3.11242900 | 0.54210600  |
| H  | -4.38966400 | -2.36869200 | -0.68909900 |
| H  | 0.00011000  | 0.00002800  | 2.34996900  |

**PMacacS**

|    |             |             |             |
|----|-------------|-------------|-------------|
| Si | 0.16232500  | -0.24384800 | 1.32435300  |
| C  | 0.31093100  | -0.72952000 | 3.11763500  |
| H  | 1.22149400  | -0.30205300 | 3.56661600  |
| H  | -0.55725500 | -0.38076500 | 3.69896200  |
| H  | 0.36824000  | -1.82558700 | 3.21441000  |
| O  | -1.29129000 | -0.72327900 | 0.75260200  |
| O  | 1.44756600  | -0.83987000 | 0.51490400  |
| Si | -2.36605700 | -1.56904200 | -0.22026300 |

|    |             |             |             |
|----|-------------|-------------|-------------|
| Si | 2.83190300  | -0.69319100 | -0.42982700 |
| C  | 4.12403800  | -1.81509800 | 0.36156100  |
| H  | 4.34451000  | -1.50345900 | 1.39593500  |
| H  | 3.77328000  | -2.85992600 | 0.39373900  |
| H  | 5.07016400  | -1.79561600 | -0.20535300 |
| C  | 2.45797700  | -1.25599100 | -2.18170400 |
| H  | 1.68810200  | -0.60547300 | -2.62358300 |
| H  | 3.36274400  | -1.21353100 | -2.81150600 |
| H  | 2.08355200  | -2.29257800 | -2.19690700 |
| C  | 3.41675600  | 1.09625500  | -0.40133300 |
| H  | 4.35312800  | 1.21573900  | -0.97215800 |
| H  | 2.65551900  | 1.75525800  | -0.84625100 |
| H  | 3.60366000  | 1.43867400  | 0.62980700  |
| C  | -3.73090800 | -0.37502200 | -0.72680500 |
| H  | -4.21220200 | 0.07204300  | 0.15845300  |
| H  | -3.33193500 | 0.44554100  | -1.34415000 |
| H  | -4.51125000 | -0.89009500 | -1.31198500 |
| C  | -1.46740500 | -2.25252500 | -1.72116300 |
| H  | -0.67253300 | -2.95403100 | -1.41969800 |
| H  | -2.15886800 | -2.78956800 | -2.39208200 |
| H  | -0.99504100 | -1.43177300 | -2.28281600 |
| C  | -3.08694600 | -2.96269500 | 0.82404900  |
| H  | -3.83039500 | -3.54486900 | 0.25372300  |
| H  | -2.29891900 | -3.65926300 | 1.15514900  |
| H  | -3.58660500 | -2.56812700 | 1.72416300  |
| O  | 0.21605900  | 1.45600900  | 1.34779400  |
| C  | -0.46991600 | 2.52944300  | 0.96973500  |
| C  | -0.87454500 | 2.81183400  | -0.30313600 |
| H  | -1.41261100 | 3.75151000  | -0.44284000 |
| C  | -0.60653100 | 2.01870400  | -1.50290300 |
| O  | -0.01361500 | 0.94378400  | -1.49430600 |
| C  | -1.10241900 | 2.61298200  | -2.81278700 |
| H  | -2.19537800 | 2.75748100  | -2.77998800 |
| H  | -0.65308800 | 3.60579400  | -2.98138300 |
| H  | -0.84393600 | 1.94638800  | -3.64565700 |
| C  | -0.73212600 | 3.47450500  | 2.11028100  |
| H  | -1.33429900 | 2.96704800  | 2.88274900  |
| H  | 0.22412500  | 3.74947600  | 2.58539500  |
| H  | -1.25180600 | 4.38650400  | 1.78903200  |
| 1a |             |             |             |
| C  | 3.95918700  | 0.28874700  | 0.24594800  |
| C  | 2.56914800  | 0.42357800  | 0.18750800  |
| C  | 1.74338300  | -0.71302600 | -0.00982100 |

|   |             |             |             |
|---|-------------|-------------|-------------|
| C | 2.37515200  | -1.96741900 | -0.17399700 |
| C | 3.76041700  | -2.09424000 | -0.12405900 |
| C | 4.55569900  | -0.96310600 | 0.09453200  |
| H | 4.55464700  | 1.18848500  | 0.41218900  |
| H | 1.74511600  | -2.84564400 | -0.32835500 |
| H | 4.22134000  | -3.07675300 | -0.24867200 |
| H | 5.64361500  | -1.05400900 | 0.14065200  |
| C | 0.32039200  | -0.62109400 | -0.00403300 |
| C | -0.89768300 | -0.55966800 | 0.00928300  |
| C | -2.32152100 | -0.45196700 | 0.02802100  |
| C | -3.13712700 | -1.59902900 | -0.08402300 |
| C | -2.93790700 | 0.81214500  | 0.15999600  |
| C | -4.52638900 | -1.48132500 | -0.06385500 |
| H | -2.66693700 | -2.57935100 | -0.18577400 |
| C | -4.32793400 | 0.91895800  | 0.17928200  |
| H | -2.30992900 | 1.70151400  | 0.24500500  |
| C | -5.12700800 | -0.22445300 | 0.06776700  |
| H | -5.14616400 | -2.37739800 | -0.15107700 |
| H | -4.79271300 | 1.90286600  | 0.28246900  |
| H | -6.21622600 | -0.13622700 | 0.08348100  |
| O | 2.05832700  | 1.67767300  | 0.39465900  |
| C | 1.19811900  | 2.23619400  | -0.50909500 |
| H | 1.08102900  | 1.68040200  | -1.44523900 |
| C | 0.58617100  | 3.39785900  | -0.27034200 |
| H | 0.72512500  | 3.92848400  | 0.67406400  |
| H | -0.05810200 | 3.83332600  | -1.03469700 |

TS1 (doublet)

|   |            |             |             |
|---|------------|-------------|-------------|
| C | 1.06492200 | 3.65015400  | -0.05551000 |
| C | 1.72544700 | 2.42058000  | -0.00734600 |
| C | 3.10209600 | 2.32080300  | -0.33074500 |
| C | 3.77147700 | 3.50220500  | -0.72455200 |
| C | 3.10952900 | 4.72586400  | -0.77836200 |
| C | 1.75392800 | 4.80205500  | -0.43738300 |
| H | 0.00518800 | 3.67313900  | 0.20709400  |
| H | 4.83178100 | 3.43576700  | -0.97611300 |
| H | 3.65259500 | 5.62385800  | -1.08177600 |
| H | 1.22910000 | 5.75969400  | -0.47512100 |
| C | 3.81146500 | 1.08791700  | -0.23115700 |
| C | 4.43624600 | 0.04405500  | -0.14199000 |
| C | 5.14559600 | -1.19032500 | -0.03066900 |
| C | 6.52784200 | -1.25833200 | -0.31093900 |
| C | 4.47225000 | -2.36762600 | 0.36373400  |
| C | 7.21164900 | -2.46827500 | -0.19871300 |

|    |             |             |             |
|----|-------------|-------------|-------------|
| H  | 7.05484900  | -0.35190000 | -0.61597100 |
| C  | 5.16497100  | -3.57260900 | 0.47306200  |
| H  | 3.40312000  | -2.32007200 | 0.58061100  |
| C  | 6.53487300  | -3.62856300 | 0.19307100  |
| H  | 8.28165500  | -2.50680200 | -0.41829500 |
| H  | 4.63206600  | -4.47626000 | 0.77977400  |
| H  | 7.07433600  | -4.57500000 | 0.28023100  |
| O  | 0.99968300  | 1.33840900  | 0.42587000  |
| C  | 0.88239100  | 0.23090600  | -0.35365500 |
| H  | 1.30268700  | 0.30921900  | -1.36080500 |
| C  | 0.12760100  | -0.82532700 | 0.06763200  |
| H  | -0.12677300 | -0.91689000 | 1.12543800  |
| H  | 0.16067100  | -1.74154800 | -0.52471400 |
| Fe | -2.93412000 | -0.42985800 | 0.08309200  |
| O  | -3.30053600 | 1.13976000  | -0.92643100 |
| C  | -3.24822000 | 2.34546700  | -0.52131600 |
| C  | -3.61852000 | 3.38762400  | -1.55231800 |
| H  | -4.64363200 | 3.19711000  | -1.90919200 |
| H  | -3.55564600 | 4.41306900  | -1.16393400 |
| H  | -2.95563500 | 3.28662400  | -2.42679100 |
| C  | -2.88090200 | 2.74006100  | 0.78040300  |
| H  | -2.86612200 | 3.80468200  | 1.01547300  |
| C  | -2.55897800 | 1.82414400  | 1.80202600  |
| O  | -2.57331300 | 0.55767600  | 1.67095400  |
| C  | -2.15468400 | 2.32600000  | 3.16877600  |
| H  | -2.74581400 | 1.80805200  | 3.93995900  |
| H  | -1.09784400 | 2.06513200  | 3.34500800  |
| H  | -2.27682600 | 3.41213600  | 3.27736200  |
| O  | -2.80519800 | -2.00719500 | 1.15428700  |
| C  | -2.91159100 | -3.21366600 | 0.75910600  |
| C  | -2.72429800 | -4.26292500 | 1.83171900  |
| H  | -3.48984900 | -4.12390500 | 2.61253800  |
| H  | -2.79033800 | -5.28728900 | 1.44121800  |
| H  | -1.74676900 | -4.11895300 | 2.31928800  |
| C  | -3.20505100 | -3.60172100 | -0.56212400 |
| H  | -3.27357300 | -4.66629900 | -0.78635000 |
| C  | -3.49561500 | -2.68141500 | -1.58876900 |
| O  | -3.46345500 | -1.41565900 | -1.45906900 |
| C  | -3.90672000 | -3.17920900 | -2.95593300 |
| H  | -4.92282800 | -2.81760000 | -3.18348400 |
| H  | -3.23924800 | -2.74562000 | -3.71777900 |
| H  | -3.88812900 | -4.27453700 | -3.03391500 |
| H  | -1.40555900 | -0.54047500 | -0.28333200 |

## TS1 (quartet)

|    |              |              |              |
|----|--------------|--------------|--------------|
| C  | 1. 26085200  | 3. 41539900  | -0. 36284000 |
| C  | 1. 94264800  | 2. 20610400  | -0. 21676200 |
| C  | 3. 31640000  | 2. 09686500  | -0. 54636000 |
| C  | 3. 96279400  | 3. 24807900  | -1. 05177800 |
| C  | 3. 28018500  | 4. 45191000  | -1. 20508400 |
| C  | 1. 92773700  | 4. 53864000  | -0. 85459500 |
| H  | 0. 20495500  | 3. 45020700  | -0. 08544300 |
| H  | 5. 02097900  | 3. 17544200  | -1. 31028600 |
| H  | 3. 80526300  | 5. 32740800  | -1. 59387300 |
| H  | 1. 38771800  | 5. 48148100  | -0. 96940700 |
| C  | 4. 04223500  | 0. 88562900  | -0. 34809800 |
| C  | 4. 67667000  | -0. 14183400 | -0. 17543000 |
| C  | 5. 40081100  | -1. 35484300 | 0. 03378600  |
| C  | 6. 77990100  | -1. 43290500 | -0. 25909700 |
| C  | 4. 74598200  | -2. 49965500 | 0. 53924600  |
| C  | 7. 47877600  | -2. 62132700 | -0. 05105800 |
| H  | 7. 29249900  | -0. 55142800 | -0. 64976000 |
| C  | 5. 45372500  | -3. 68333900 | 0. 74372400  |
| H  | 3. 67937900  | -2. 44467100 | 0. 76661800  |
| C  | 6. 82033000  | -3. 74955500 | 0. 45029200  |
| H  | 8. 54613600  | -2. 66815100 | -0. 28152600 |
| H  | 4. 93521400  | -4. 56193100 | 1. 13589200  |
| H  | 7. 37158600  | -4. 67917600 | 0. 61232200  |
| O  | 1. 24109800  | 1. 15157000  | 0. 32163400  |
| C  | 1. 11110800  | -0. 00908500 | -0. 36915800 |
| H  | 1. 55014000  | -0. 01797900 | -1. 37163500 |
| C  | 0. 37337600  | -1. 03230000 | 0. 12964500  |
| H  | 0. 04487600  | -1. 01553800 | 1. 17003900  |
| H  | 0. 36164200  | -1. 97866300 | -0. 41219400 |
| Fe | -2. 82206000 | -0. 34082100 | 0. 04567500  |
| O  | -3. 51182500 | 1. 47835200  | -0. 48946300 |
| C  | -3. 36319700 | 2. 60525200  | 0. 07794300  |
| C  | -4. 05532300 | 3. 77453700  | -0. 58883500 |
| H  | -5. 14125100 | 3. 58571100  | -0. 60709200 |
| H  | -3. 86434400 | 4. 73242600  | -0. 08616300 |
| H  | -3. 72912800 | 3. 83774000  | -1. 63942100 |
| C  | -2. 61262700 | 2. 81577200  | 1. 25280600  |
| H  | -2. 53617500 | 3. 83054400  | 1. 64415800  |
| C  | -1. 98012800 | 1. 77498000  | 1. 96938600  |
| O  | -2. 02573300 | 0. 54823900  | 1. 65031700  |
| C  | -1. 17413600 | 2. 09913300  | 3. 20770800  |
| H  | -1. 48448500 | 1. 43559100  | 4. 02977000  |
| H  | -0. 11291200 | 1. 88307100  | 3. 00020600  |

|   |             |             |             |
|---|-------------|-------------|-------------|
| H | -1.27216700 | 3.14740000  | 3.52097500  |
| O | -3.58492800 | -1.91612400 | 1.02852400  |
| C | -4.12841000 | -2.96943400 | 0.56627400  |
| C | -4.62381900 | -3.95978200 | 1.59742200  |
| H | -5.37944600 | -3.47034000 | 2.23353100  |
| H | -5.05803800 | -4.86458900 | 1.15103700  |
| H | -3.78914700 | -4.24138700 | 2.25957000  |
| C | -4.28816000 | -3.24938800 | -0.80500200 |
| H | -4.75817600 | -4.19117700 | -1.08854000 |
| C | -3.89284700 | -2.36584900 | -1.83300900 |
| O | -3.34468400 | -1.23682100 | -1.64563600 |
| C | -4.13057800 | -2.74490600 | -3.27917500 |
| H | -4.76067600 | -1.97625200 | -3.75527400 |
| H | -3.16912500 | -2.74416300 | -3.81786200 |
| H | -4.60911500 | -3.72714500 | -3.39121300 |
| H | -1.29988500 | -0.68341800 | -0.30669700 |

TS1 (sextet)

|   |            |             |             |
|---|------------|-------------|-------------|
| C | 1.43276200 | 3.53132700  | 0.12790200  |
| C | 2.01999200 | 2.26503500  | 0.04435400  |
| C | 3.42376600 | 2.13019600  | -0.11425300 |
| C | 4.19319500 | 3.31299400  | -0.20790900 |
| C | 3.60321600 | 4.57135400  | -0.13053500 |
| C | 2.21853000 | 4.68090700  | 0.04473300  |
| H | 0.34910100 | 3.58434900  | 0.25187500  |
| H | 5.27380800 | 3.21623500  | -0.33051000 |
| H | 4.22328400 | 5.46792700  | -0.20168400 |
| H | 1.74722600 | 5.66478400  | 0.10841600  |
| C | 4.06524900 | 0.85693800  | -0.13684100 |
| C | 4.64014200 | -0.21882200 | -0.14704500 |
| C | 5.28091900 | -1.49482100 | -0.15786600 |
| C | 6.68609700 | -1.59995400 | -0.24842300 |
| C | 4.51391600 | -2.67827400 | -0.07764600 |
| C | 7.30106900 | -2.85137700 | -0.25794100 |
| H | 7.28539900 | -0.68920800 | -0.31037900 |
| C | 5.13830100 | -3.92482300 | -0.08775500 |
| H | 3.42687400 | -2.60111700 | -0.00879600 |
| C | 6.53174000 | -4.01733500 | -0.17773100 |
| H | 8.38979200 | -2.91810900 | -0.32824800 |
| H | 4.53298200 | -4.83278200 | -0.02473000 |
| H | 7.01732600 | -4.99640600 | -0.18531000 |
| O | 1.18819000 | 1.18696000  | 0.18358800  |
| C | 1.17678500 | 0.19472800  | -0.75843500 |
| H | 1.69601300 | 0.42452200  | -1.69323900 |

|    |             |             |             |
|----|-------------|-------------|-------------|
| C  | 0.39267400  | -0.90689500 | -0.58148500 |
| H  | 0.02753400  | -1.16811800 | 0.41359300  |
| H  | 0.47146900  | -1.71355600 | -1.31142600 |
| Fe | -2.76685200 | -0.33690400 | -0.22116900 |
| O  | -3.18830000 | 1.42588300  | -1.12208800 |
| C  | -3.04782700 | 2.61127600  | -0.69129500 |
| C  | -3.40440000 | 3.71150900  | -1.66549700 |
| H  | -4.45576200 | 3.59163200  | -1.97331800 |
| H  | -3.25903300 | 4.71776600  | -1.25022600 |
| H  | -2.79368200 | 3.59825500  | -2.57568800 |
| C  | -2.59404300 | 2.94299800  | 0.60416800  |
| H  | -2.51107300 | 3.99741500  | 0.86809000  |
| C  | -2.26064100 | 1.98307400  | 1.58165100  |
| O  | -2.34829500 | 0.72498900  | 1.41782700  |
| C  | -1.75394200 | 2.42876800  | 2.93329300  |
| H  | -2.34879400 | 1.94467400  | 3.72364800  |
| H  | -0.71632600 | 2.07531300  | 3.05141100  |
| H  | -1.78127900 | 3.51880500  | 3.06421000  |
| O  | -2.48560900 | -2.07812300 | 0.80605300  |
| C  | -3.18960800 | -3.13381000 | 0.82615200  |
| C  | -2.67197000 | -4.25590800 | 1.69770300  |
| H  | -2.57189100 | -3.89039100 | 2.73244700  |
| H  | -3.31841300 | -5.14352400 | 1.68467100  |
| H  | -1.66028000 | -4.53594600 | 1.36201700  |
| C  | -4.38803400 | -3.30762600 | 0.10055400  |
| H  | -4.91239900 | -4.25879400 | 0.19010700  |
| C  | -4.93952200 | -2.31972400 | -0.73724300 |
| O  | -4.43476300 | -1.16630600 | -0.92776300 |
| C  | -6.22259200 | -2.59842400 | -1.48571500 |
| H  | -6.97556600 | -1.84463700 | -1.20393500 |
| H  | -6.04299200 | -2.47666200 | -2.56616800 |
| H  | -6.62184500 | -3.60298800 | -1.29274000 |
| H  | -1.25774300 | -0.59702700 | -1.08600500 |

Fe(acac)<sub>2</sub> (singlet)

|    |            |             |             |
|----|------------|-------------|-------------|
| Fe | 0.00025900 | 0.00086700  | 0.73908700  |
| O  | 1.63561600 | 0.92447800  | 1.02755700  |
| C  | 2.74199800 | 0.68960500  | 0.44563900  |
| C  | 3.88884100 | 1.59945100  | 0.81862800  |
| H  | 4.06158100 | 1.54287800  | 1.90579800  |
| H  | 4.81921900 | 1.34873200  | 0.29202000  |
| H  | 3.61363500 | 2.64280500  | 0.59465200  |
| C  | 2.93688800 | -0.35488100 | -0.48307900 |
| H  | 3.92321400 | -0.46644900 | -0.93355900 |



|   |             |             |             |
|---|-------------|-------------|-------------|
| C | 1.94834700  | -1.29717800 | -0.81626700 |
| O | 0.74931400  | -1.29948500 | -0.37032900 |
| C | 2.27183400  | -2.43411200 | -1.75742700 |
| H | 2.08254400  | -3.39371500 | -1.24970100 |
| H | 1.59181500  | -2.39444300 | -2.62383500 |
| H | 3.31121500  | -2.40981000 | -2.11047300 |
| O | -1.63464900 | -0.92367300 | 1.02876300  |
| C | -2.74110600 | -0.69007700 | 0.44669100  |
| C | -3.88705900 | -1.60119600 | 0.81947200  |
| H | -4.05760900 | -1.54774400 | 1.90711400  |
| H | -4.81849000 | -1.34936100 | 0.29527400  |
| H | -3.61204100 | -2.64386100 | 0.59199900  |
| C | -2.93709300 | 0.35399100  | -0.48235900 |
| H | -3.92355200 | 0.46446400  | -0.93280300 |
| C | -1.94945700 | 1.29700400  | -0.81597000 |
| O | -0.75032900 | 1.30042000  | -0.37025400 |
| C | -2.27401500 | 2.43325000  | -1.75761100 |
| H | -2.08535600 | 3.39324400  | -1.25037900 |
| H | -1.59414600 | 2.39370400  | -2.62415500 |
| H | -3.31345200 | 2.40794600  | -2.11041600 |

Fe(acac)<sub>2</sub> (triplet)

|    |             |             |             |
|----|-------------|-------------|-------------|
| Fe | 0.00002700  | -0.00002300 | 0.00061900  |
| O  | 1.33080700  | -1.38457900 | 0.00024100  |
| C  | 2.59440600  | -1.23976000 | -0.00035100 |
| C  | 3.38912100  | -2.52464000 | -0.00273600 |
| H  | 3.11141400  | -3.11891300 | -0.88825200 |
| H  | 4.47411000  | -2.35647700 | -0.00142100 |
| H  | 3.10978800  | -3.12351500 | 0.87912700  |
| C  | 3.26382400  | -0.00005100 | 0.00102800  |
| H  | 4.35351100  | 0.00004100  | 0.00135200  |
| C  | 2.59438000  | 1.23973100  | 0.00115200  |
| O  | 1.33094900  | 1.38445300  | 0.00011300  |
| C  | 3.38929000  | 2.52456100  | 0.00033300  |
| H  | 3.12325000  | 3.11268400  | -0.89296100 |
| H  | 3.09857300  | 3.12954000  | 0.87416600  |
| H  | 4.47414200  | 2.35633800  | 0.01601200  |
| O  | -1.33079100 | 1.38457300  | 0.00099900  |
| C  | -2.59439500 | 1.23981700  | -0.00024200 |
| C  | -3.38909300 | 2.52473600  | -0.00276000 |
| H  | -3.11159400 | 3.11881800  | -0.88848500 |
| H  | -4.47408200 | 2.35657800  | -0.00121000 |
| H  | -3.10956100 | 3.12382900  | 0.87888900  |
| C  | -3.26386200 | 0.00007700  | 0.00049900  |

|   |             |             |             |
|---|-------------|-------------|-------------|
| H | -4.35355000 | 0.00002000  | 0.00014100  |
| C | -2.59441600 | -1.23975500 | 0.00123600  |
| O | -1.33093700 | -1.38454400 | 0.00112100  |
| C | -3.38936600 | -2.52455700 | 0.00019100  |
| H | -3.12284600 | -3.11284800 | -0.89285100 |
| H | -3.09920400 | -3.12942100 | 0.87429300  |
| H | -4.47421800 | -2.35626100 | 0.01520900  |

**Fe(acac)<sub>2</sub> (quintet)**

|    |             |             |             |
|----|-------------|-------------|-------------|
| Fe | 0.00000000  | -0.00000600 | 0.00021000  |
| O  | 1.39051700  | -0.99077400 | -0.99039600 |
| C  | 2.65583800  | -0.88336100 | -0.88250700 |
| C  | 3.46763600  | -1.78541500 | -1.78372900 |
| H  | 3.19931800  | -1.58493400 | -2.83377700 |
| H  | 4.55061000  | -1.65761000 | -1.65497200 |
| H  | 3.19813200  | -2.83516000 | -1.58330700 |
| C  | 3.31242000  | 0.00008600  | 0.00035900  |
| H  | 4.40241800  | 0.00014500  | 0.00037700  |
| C  | 2.65569200  | 0.88328400  | 0.88337700  |
| O  | 1.39035700  | 0.99062700  | 0.99103900  |
| C  | 3.46733400  | 1.78519400  | 1.78487000  |
| H  | 3.19763600  | 2.83497400  | 1.58489500  |
| H  | 3.19909200  | 1.58423200  | 2.83484600  |
| H  | 4.55032400  | 1.65762600  | 1.65602300  |
| O  | -1.39014500 | 0.99073200  | -0.99094400 |
| C  | -2.65550600 | 0.88329600  | -0.88355500 |
| C  | -3.46696500 | 1.78547500  | -1.78495700 |
| H  | -3.19825300 | 1.58511800  | -2.83492500 |
| H  | -4.54998700 | 1.65766600  | -1.65661300 |
| H  | -3.19753300 | 2.83519800  | -1.58431000 |
| C  | -3.31242000 | -0.00009500 | -0.00087800 |
| H  | -4.40241800 | -0.00009900 | -0.00121500 |
| C  | -2.65602300 | -0.88329600 | 0.88238300  |
| O  | -1.39072900 | -0.99063500 | 0.99052400  |
| C  | -3.46800500 | -1.78515500 | 1.78362100  |
| H  | -3.19825700 | -2.83494900 | 1.58378200  |
| H  | -3.20013200 | -1.58415900 | 2.83368400  |
| H  | -4.55094600 | -1.65757000 | 1.65438400  |

**tBuONO**

|   |             |            |             |
|---|-------------|------------|-------------|
| C | -0.74978300 | 0.00678100 | -0.00000400 |
| C | -0.91473300 | 0.84627400 | -1.27021300 |
| H | -1.93645900 | 1.25305700 | -1.32552100 |
| H | -0.20739300 | 1.68792800 | -1.28435700 |

|   |             |             |             |
|---|-------------|-------------|-------------|
| H | -0.74074700 | 0.22937400  | -2.16528200 |
| C | -0.91477700 | 0.84687300  | 1.26980200  |
| H | -1.93650700 | 1.25367600  | 1.32488700  |
| H | -0.74081300 | 0.23039700  | 2.16516900  |
| H | -0.20744200 | 1.68853800  | 1.28356900  |
| C | -1.69948800 | -1.19104100 | 0.00026200  |
| H | -1.53629400 | -1.81536700 | -0.89092200 |
| H | -1.53632200 | -1.81494900 | 0.89174300  |
| H | -2.74522100 | -0.84713600 | 0.00016500  |
| O | 0.57480500  | -0.62387100 | 0.00017300  |
| N | 1.62085200  | 0.29467100  | -0.00003500 |
| O | 2.66443500  | -0.24882100 | 0.00004100  |

**B**

|   |             |             |             |
|---|-------------|-------------|-------------|
| C | -3.98669100 | 0.18257500  | -0.22433700 |
| C | -2.60397900 | 0.38206900  | -0.15700300 |
| C | -1.72649400 | -0.72254000 | 0.00448200  |
| C | -2.29972500 | -2.00981300 | 0.12013000  |
| C | -3.67766700 | -2.20012800 | 0.06279700  |
| C | -4.52423200 | -1.10000500 | -0.11838500 |
| H | -4.62344100 | 1.05892700  | -0.35930600 |
| H | -1.62967600 | -2.86312400 | 0.24294300  |
| H | -4.09197200 | -3.20695000 | 0.15190300  |
| H | -5.60679900 | -1.23969800 | -0.17008300 |
| C | -0.30710600 | -0.57821800 | 0.00022000  |
| C | 0.91132600  | -0.51280500 | -0.01596000 |
| C | 2.33739800  | -0.43391200 | -0.03214000 |
| C | 3.12280400  | -1.59150200 | 0.16372800  |
| C | 2.99138000  | 0.79987800  | -0.24419600 |
| C | 4.51474100  | -1.51296200 | 0.14764400  |
| H | 2.62572900  | -2.54976500 | 0.32803000  |
| C | 4.38390500  | 0.86886000  | -0.25857600 |
| H | 2.39277300  | 1.69990600  | -0.39769900 |
| C | 5.15106100  | -0.28478900 | -0.06309100 |
| H | 5.10868200  | -2.41767600 | 0.30064700  |
| H | 4.87525500  | 1.83099600  | -0.42443000 |
| H | 6.24231000  | -0.22692900 | -0.07533900 |
| O | -2.14972000 | 1.66095600  | -0.31302400 |
| C | -1.35595100 | 2.24813900  | 0.64238800  |
| H | -1.04084200 | 1.61375700  | 1.47491400  |
| C | -0.58450200 | 3.42714800  | 0.18280500  |
| H | -1.23024700 | 4.13097500  | -0.37011500 |
| H | -0.14748400 | 3.95796300  | 1.04209300  |
| H | 0.24586200  | 3.15198700  | -0.50241000 |

TS2

|   |             |             |             |
|---|-------------|-------------|-------------|
| C | -1.09932800 | 2.01204800  | -0.48045700 |
| C | -0.36173300 | -0.17753200 | -0.05630200 |
| C | -1.75251000 | -0.55267400 | -0.02772700 |
| C | -2.74235400 | 0.45539900  | 0.00060700  |
| C | -4.10131900 | 0.13857300  | 0.06357500  |
| C | -4.49007900 | -1.20114600 | 0.09895300  |
| C | -3.52835100 | -2.22002700 | 0.07096500  |
| C | -2.17320500 | -1.89668200 | 0.01290500  |
| H | -4.83091700 | 0.95026200  | 0.08479500  |
| H | -5.55272200 | -1.45231000 | 0.14543000  |
| H | -3.83711900 | -3.26758800 | 0.09511500  |
| H | -1.41468600 | -2.68209100 | -0.00164600 |
| H | -1.00071100 | 1.85940500  | -1.56365900 |
| C | -0.35362400 | 3.10913900  | 0.18575200  |
| H | 0.68688700  | 3.12829000  | -0.17309700 |
| H | -0.79878200 | 4.10298700  | -0.02307700 |
| H | -0.34762000 | 2.97291400  | 1.27901500  |
| C | 0.86593800  | -0.32781600 | -0.01829000 |
| C | 2.28569600  | -0.35336700 | 0.00208100  |
| C | 3.02740400  | -0.46597300 | -1.19971000 |
| C | 2.99642700  | -0.27279800 | 1.22497400  |
| C | 4.42022000  | -0.49353200 | -1.17353500 |
| H | 2.49163500  | -0.53208500 | -2.14902200 |
| C | 4.38929100  | -0.30031100 | 1.23863200  |
| H | 2.43625000  | -0.18867400 | 2.15858000  |
| C | 5.10886100  | -0.41057300 | 0.04259500  |
| H | 4.97567300  | -0.58072500 | -2.11105800 |
| H | 4.92063500  | -0.23592200 | 2.19182900  |
| H | 6.20130900  | -0.43275600 | 0.05834300  |
| O | -2.35973000 | 1.76274000  | 0.01229300  |

C

|   |             |             |             |
|---|-------------|-------------|-------------|
| C | -1.61722100 | -0.43654000 | -0.03139100 |
| C | -2.77862600 | 0.34245700  | -0.16416800 |
| C | -4.05278700 | -0.21564400 | -0.06608800 |
| C | -4.13876900 | -1.59262900 | 0.17365900  |
| C | -2.98823800 | -2.38453800 | 0.31122300  |
| C | -1.71703500 | -1.80826400 | 0.21049800  |
| C | -1.09463900 | 1.86244200  | -0.44882400 |
| H | -4.94143200 | 0.40875600  | -0.17385000 |
| H | -5.12478100 | -2.05775000 | 0.25416500  |
| H | -3.08684800 | -3.45640900 | 0.49749500  |

|   |             |             |             |
|---|-------------|-------------|-------------|
| H | -0.81464400 | -2.41556100 | 0.31676200  |
| H | -0.86159100 | 2.18492700  | -1.47895000 |
| C | -0.69404600 | 2.94404300  | 0.54026500  |
| H | 0.38919300  | 3.12948500  | 0.47447300  |
| H | -1.22634600 | 3.88183800  | 0.31976400  |
| H | -0.93485200 | 2.63531300  | 1.56895400  |
| C | -0.46503400 | 0.47336900  | -0.18344300 |
| C | 0.81984600  | 0.21440900  | -0.11628900 |
| C | 2.17158000  | -0.05119700 | -0.06023400 |
| C | 2.91001800  | -0.41686400 | -1.23781500 |
| C | 2.89862900  | 0.02528800  | 1.17711200  |
| C | 4.26943900  | -0.68155900 | -1.16915900 |
| H | 2.37907100  | -0.48365000 | -2.18968300 |
| C | 4.25819900  | -0.24417300 | 1.21914000  |
| H | 2.35861400  | 0.29921400  | 2.08582000  |
| C | 4.95789400  | -0.59890600 | 0.05316900  |
| H | 4.80945100  | -0.95802500 | -2.07878000 |
| H | 4.78945300  | -0.17952600 | 2.17257400  |
| H | 6.02896000  | -0.80941400 | 0.09674000  |
| O | -2.52493700 | 1.65383000  | -0.38892600 |

FeOtBu(acac)<sub>2</sub>

|    |             |             |             |
|----|-------------|-------------|-------------|
| Fe | 0.01189500  | -0.03687600 | -0.47607400 |
| O  | -1.83688200 | 0.14193600  | -1.03327900 |
| C  | -2.67130100 | 1.04511500  | -0.70148200 |
| C  | -4.09365200 | 0.80348700  | -1.14739800 |
| H  | -4.43280000 | -0.17214100 | -0.76419300 |
| H  | -4.78331800 | 1.58994500  | -0.81350500 |
| H  | -4.12085100 | 0.73912200  | -2.24734800 |
| C  | -2.33741400 | 2.21431500  | 0.00014200  |
| H  | -3.12709200 | 2.92640600  | 0.23753500  |
| C  | -1.00578600 | 2.56003100  | 0.30367400  |
| O  | 0.00766100  | 1.83136400  | 0.06933200  |
| C  | -0.70223200 | 3.90655700  | 0.91916300  |
| H  | -0.15843500 | 3.75889200  | 1.86581500  |
| H  | -0.03252800 | 4.47028500  | 0.24974700  |
| H  | -1.60688200 | 4.49955600  | 1.10744500  |
| O  | -0.41515700 | -0.52675000 | 1.29878400  |
| C  | -0.60676800 | -1.72997200 | 1.69284900  |
| C  | -0.90066700 | -1.85602700 | 3.16913300  |
| H  | -1.77520500 | -1.23486600 | 3.42007900  |
| H  | -1.08867300 | -2.89352000 | 3.47442600  |
| H  | -0.04967700 | -1.45546400 | 3.74327400  |
| C  | -0.56261600 | -2.87317300 | 0.88415500  |

|   |             |             |             |
|---|-------------|-------------|-------------|
| H | -0.74749600 | -3.83794500 | 1.35521000  |
| C | -0.29863800 | -2.85316100 | -0.50592400 |
| O | -0.06393400 | -1.80907900 | -1.18004600 |
| C | -0.28512500 | -4.14570200 | -1.28740600 |
| H | -1.01675000 | -4.07907600 | -2.10820300 |
| H | 0.70553600  | -4.27423400 | -1.75206600 |
| H | -0.51227900 | -5.02085900 | -0.66478100 |
| O | 1.76404700  | -0.04722900 | -0.73559200 |
| C | 2.89266000  | 0.62609500  | -0.20875600 |
| C | 3.04206300  | 1.99961700  | -0.88703900 |
| H | 3.96599200  | 2.50438600  | -0.55985300 |
| H | 3.08687000  | 1.87353200  | -1.98047700 |
| H | 2.18302000  | 2.63961200  | -0.64661000 |
| C | 2.77831600  | 0.77459500  | 1.31778500  |
| H | 1.90557900  | 1.38491800  | 1.58517300  |
| H | 2.66579600  | -0.21528800 | 1.78739600  |
| H | 3.68299700  | 1.25006000  | 1.73055800  |
| C | 4.10156100  | -0.26263100 | -0.55730500 |
| H | 3.98629300  | -1.25604700 | -0.09670400 |
| H | 4.16840100  | -0.39970300 | -1.64761400 |
| H | 5.04393300  | 0.18439900  | -0.20052000 |

#### NO

|   |            |            |             |
|---|------------|------------|-------------|
| N | 0.00000000 | 0.00000000 | -0.61253700 |
| O | 0.00000000 | 0.00000000 | 0.53597000  |

#### TS3

|   |             |             |             |
|---|-------------|-------------|-------------|
| C | -1.93884500 | -0.44931800 | 0.00664600  |
| C | -3.07947500 | 0.34174700  | -0.21084800 |
| C | -4.36685700 | -0.18834500 | -0.12793000 |
| C | -4.48761600 | -1.54786600 | 0.18508600  |
| C | -3.35814100 | -2.35077100 | 0.40784600  |
| C | -2.07322700 | -1.80359800 | 0.31928700  |
| C | -1.35540400 | 1.82194900  | -0.46908900 |
| H | -5.23911300 | 0.44402500  | -0.30253600 |
| H | -5.48465400 | -1.99041400 | 0.25666800  |
| H | -3.48401800 | -3.40830600 | 0.65097200  |
| H | -1.18682700 | -2.41985400 | 0.48930900  |
| H | -1.05302900 | 2.15287000  | -1.47732100 |
| C | -1.01228300 | 2.88927300  | 0.55770200  |
| H | 0.07668200  | 3.04133400  | 0.58337100  |
| H | -1.50331800 | 3.84004100  | 0.30041300  |
| H | -1.34653500 | 2.57943500  | 1.55978900  |
| C | -0.76605600 | 0.42842900  | -0.17021000 |

|   |              |              |              |
|---|--------------|--------------|--------------|
| C | 0. 51093300  | 0. 11712600  | -0. 10053100 |
| C | 1. 70260300  | -0. 54232800 | -0. 01383700 |
| C | 2. 32533100  | -1. 14836500 | -1. 17199000 |
| C | 2. 55078500  | -0. 32654100 | 1. 15856300  |
| C | 3. 65224200  | -1. 48529900 | -1. 15655400 |
| H | 1. 71792400  | -1. 30079800 | -2. 06652500 |
| C | 3. 89218100  | -0. 79294100 | 1. 16140800  |
| H | 2. 06893600  | -0. 04714600 | 2. 09647200  |
| C | 4. 45671100  | -1. 29811300 | 0. 01454500  |
| H | 4. 10745200  | -1. 92353100 | -2. 04896800 |
| H | 4. 48442700  | -0. 69727400 | 2. 07517500  |
| H | 5. 50660700  | -1. 59974900 | -0. 00123500 |
| O | -2. 79139400 | 1. 63149800  | -0. 50268200 |
| N | 2. 48192800  | 1. 60125100  | 0. 37592200  |
| O | 3. 29697900  | 1. 88479900  | -0. 38326800 |

(Z)-D

|   |              |              |              |
|---|--------------|--------------|--------------|
| C | -1. 32754400 | -0. 48750700 | 0. 01974400  |
| C | -2. 70585800 | -0. 23547900 | -0. 17294900 |
| C | -3. 66477900 | -1. 24998500 | -0. 10387100 |
| C | -3. 21396600 | -2. 53907900 | 0. 18014300  |
| C | -1. 84841200 | -2. 81326200 | 0. 39325200  |
| C | -0. 89979500 | -1. 79730500 | 0. 31307500  |
| C | -1. 75437400 | 1. 82444800  | -0. 30380200 |
| H | -4. 72047300 | -1. 02498600 | -0. 26255200 |
| H | -3. 93942400 | -3. 35448900 | 0. 24308300  |
| H | -1. 53274000 | -3. 83322500 | 0. 62251500  |
| H | 0. 15604600  | -2. 01104900 | 0. 47695600  |
| H | -1. 63424100 | 2. 38294500  | -1. 24343400 |
| C | -1. 91672200 | 2. 79304200  | 0. 86416100  |
| H | -1. 03961700 | 3. 45108500  | 0. 91562800  |
| H | -2. 82168500 | 3. 40068400  | 0. 71470300  |
| H | -2. 01537200 | 2. 24412600  | 1. 81338700  |
| C | -0. 64675900 | 0. 78245200  | -0. 14110100 |
| C | 0. 69324200  | 1. 08268700  | -0. 16718400 |
| C | 1. 81539400  | 0. 11010300  | -0. 06926900 |
| C | 2. 04875200  | -0. 82181600 | -1. 09477500 |
| C | 2. 70199400  | 0. 15297900  | 1. 02024700  |
| C | 3. 12692700  | -1. 70754600 | -1. 02119500 |
| H | 1. 37827200  | -0. 84975700 | -1. 95757500 |
| C | 3. 77869800  | -0. 73344200 | 1. 09443900  |
| H | 2. 54390800  | 0. 88585000  | 1. 81418700  |
| C | 3. 99302100  | -1. 66717500 | 0. 07571300  |
| H | 3. 29401200  | -2. 42773900 | -1. 82635400 |

|   |             |             |             |
|---|-------------|-------------|-------------|
| H | 4.45731700  | -0.69146100 | 1.95024900  |
| H | 4.83788200  | -2.35828800 | 0.13362700  |
| N | 0.96255200  | 2.46130500  | -0.36201500 |
| O | 2.13448700  | 2.79683100  | -0.35079200 |
| O | -2.98206800 | 1.05297900  | -0.42171900 |

#### TS4

|   |             |             |             |
|---|-------------|-------------|-------------|
| C | -1.22669700 | -0.64337700 | -0.01958400 |
| C | -2.61631100 | -0.37556000 | 0.02976600  |
| C | -3.58347100 | -1.36277400 | -0.17998500 |
| C | -3.12343900 | -2.65293600 | -0.43205100 |
| C | -1.74259100 | -2.94676800 | -0.49328900 |
| C | -0.78827100 | -1.95573000 | -0.29712500 |
| C | -1.63401600 | 1.60342300  | 0.35118100  |
| H | -4.64644500 | -1.11943200 | -0.14309500 |
| H | -3.84737100 | -3.45636500 | -0.59000000 |
| H | -1.42348500 | -3.97038300 | -0.70198100 |
| H | 0.27659900  | -2.18452800 | -0.35305100 |
| H | -1.28290900 | 2.30052100  | -0.63565800 |
| C | -1.66081200 | 2.67047200  | 1.43307400  |
| H | -0.72436800 | 3.24274100  | 1.41603400  |
| H | -2.49619500 | 3.36421400  | 1.25683600  |
| H | -1.78811600 | 2.21006500  | 2.42526100  |
| C | -0.57627000 | 0.62577700  | 0.19893900  |
| C | 0.74472600  | 1.04588000  | -0.18333500 |
| C | 1.96785300  | 0.23684500  | -0.00636500 |
| C | 3.04847200  | 0.33990100  | -0.90425800 |
| C | 2.09386900  | -0.62269600 | 1.10104000  |
| C | 4.21370800  | -0.39764200 | -0.69780800 |
| H | 2.95399000  | 1.00408700  | -1.76455200 |
| C | 3.26019900  | -1.36550200 | 1.30053400  |
| H | 1.27520200  | -0.69636900 | 1.82137200  |
| C | 4.32524100  | -1.25687500 | 0.40193800  |
| H | 5.04128200  | -0.30796500 | -1.40647800 |
| H | 3.33990000  | -2.02485600 | 2.16880300  |
| H | 5.23852900  | -1.83663400 | 0.55778100  |
| N | 0.82626800  | 2.11845300  | -0.97902900 |
| O | -0.11767900 | 2.95060000  | -1.11953900 |
| O | -2.87152400 | 0.92328900  | 0.26777700  |

#### (Z)-2a

|   |             |             |             |
|---|-------------|-------------|-------------|
| C | -1.30043600 | -0.50348800 | -0.27021800 |
| C | -2.58049300 | -0.31789100 | 0.28697900  |
| C | -3.59917600 | -1.26338400 | 0.21353300  |



|   |             |             |             |
|---|-------------|-------------|-------------|
| C | -3.30203500 | -2.45085100 | -0.45951600 |
| C | -2.03237200 | -2.66513300 | -1.03173000 |
| C | -1.02462200 | -1.70398900 | -0.94705600 |
| H | -4.57738700 | -1.07562200 | 0.65973700  |
| H | -4.06839600 | -3.22506000 | -0.54513900 |
| H | -1.83501700 | -3.60478000 | -1.55365800 |
| H | -0.04493600 | -1.88141000 | -1.39509600 |
| C | -0.57216600 | 0.72078300  | 0.02431800  |
| C | 0.81766700  | 1.04638600  | -0.36547000 |
| C | 1.92560700  | 0.11279900  | -0.01368400 |
| C | 3.14296300  | 0.14162200  | -0.72230400 |
| C | 1.78763100  | -0.79837300 | 1.04818500  |
| C | 4.18817200  | -0.71192400 | -0.37341600 |
| H | 3.25158200  | 0.84408600  | -1.54978200 |
| C | 2.83749200  | -1.65278300 | 1.39604300  |
| H | 0.85342500  | -0.83209000 | 1.61180300  |
| C | 4.04075000  | -1.61384400 | 0.68757300  |
| H | 5.12466000  | -0.67871900 | -0.93649300 |
| H | 2.71226800  | -2.35175900 | 2.22700500  |
| H | 4.86023100  | -2.28509500 | 0.95712400  |
| N | 1.15969000  | 2.10570500  | -1.02052200 |
| O | 0.10057200  | 2.92146600  | -1.36862600 |
| O | -2.65604600 | 0.90422400  | 0.88822000  |
| C | -1.44637200 | 1.51937400  | 0.71878300  |
| C | -1.31838100 | 2.87642200  | 1.30780200  |
| H | -0.26632300 | 3.18508500  | 1.33991100  |
| H | -1.86816600 | 3.61623000  | 0.70197400  |
| H | -1.73634300 | 2.89527700  | 2.32673400  |
| H | 0.53498500  | 3.63404100  | -1.85616300 |

## TS5

|   |             |             |             |
|---|-------------|-------------|-------------|
| C | -1.87267300 | -0.33321500 | -0.00551400 |
| C | -3.05704300 | 0.40570500  | -0.16487000 |
| C | -4.31417000 | -0.18663200 | -0.05145200 |
| C | -4.35904700 | -1.55759900 | 0.23074700  |
| C | -3.18530000 | -2.30984400 | 0.39307900  |
| C | -1.93159400 | -1.69939400 | 0.27654400  |
| C | -1.41773900 | 1.96292600  | -0.50107700 |
| H | -5.22089000 | 0.40691200  | -0.18062500 |
| H | -5.33080400 | -2.04951600 | 0.32463500  |
| H | -3.25229500 | -3.37817800 | 0.61122000  |
| H | -1.00941900 | -2.27201900 | 0.39727100  |
| H | -1.19338300 | 2.25171800  | -1.54329000 |
| C | -1.04990600 | 3.09467300  | 0.44365300  |

|   |             |             |             |
|---|-------------|-------------|-------------|
| H | 0.02714000  | 3.31041700  | 0.36970600  |
| H | -1.60963200 | 4.00655500  | 0.18550000  |
| H | -1.28316600 | 2.82072600  | 1.48388400  |
| C | -0.75093400 | 0.60354900  | -0.18325000 |
| C | 0.54577600  | 0.39371600  | -0.10558100 |
| C | 1.90520300  | 0.49093400  | -0.08256300 |
| C | 2.63545900  | 0.78755700  | 1.13269800  |
| C | 2.67273700  | -0.06944300 | -1.19735800 |
| C | 3.97814700  | 0.53664200  | 1.22104800  |
| H | 2.08146100  | 1.18343800  | 1.98636300  |
| C | 4.08301200  | -0.20521800 | -1.09182000 |
| H | 2.19328200  | -0.12098000 | -2.17577200 |
| C | 4.71760700  | 0.02322900  | 0.10536100  |
| H | 4.50528300  | 0.74712100  | 2.15564800  |
| H | 4.64895200  | -0.54455900 | -1.96332400 |
| H | 5.79299400  | -0.14190800 | 0.20428900  |
| O | -2.84157400 | 1.71630000  | -0.43225500 |
| N | 1.74861000  | -1.78281700 | -0.48503800 |
| O | 2.31820000  | -2.38698900 | 0.30999200  |

**(E)-D**

|   |             |             |             |
|---|-------------|-------------|-------------|
| C | 1.92804800  | 0.27752500  | -0.04751300 |
| C | 2.62649500  | -0.94964400 | -0.09880900 |
| C | 4.02026700  | -1.01527700 | -0.16485200 |
| C | 4.71716000  | 0.19308300  | -0.17551100 |
| C | 4.04535100  | 1.43035200  | -0.12309700 |
| C | 2.65563400  | 1.48445000  | -0.06063300 |
| C | 0.45266100  | -1.57542500 | 0.04498100  |
| H | 4.52743000  | -1.98041100 | -0.20540700 |
| H | 5.80914500  | 0.17740200  | -0.22590100 |
| H | 4.62290500  | 2.35726700  | -0.13296300 |
| H | 2.11812000  | 2.43036100  | -0.02135400 |
| H | -0.09853300 | -1.98696700 | -0.81512400 |
| C | -0.12176900 | -2.13554300 | 1.34471900  |
| H | -1.18353300 | -1.87135600 | 1.44289600  |
| H | -0.02607100 | -3.23129700 | 1.34477400  |
| H | 0.42636200  | -1.73409100 | 2.21043500  |
| C | 0.51212400  | -0.05146700 | -0.01431500 |
| C | -0.59631400 | 0.76494100  | -0.01206900 |
| C | -2.00381000 | 0.28302900  | -0.09815000 |
| C | -2.93218100 | 0.58840000  | 0.91364200  |
| C | -2.44585800 | -0.44092700 | -1.21917300 |
| C | -4.25536100 | 0.15290800  | 0.81884300  |
| H | -2.61164200 | 1.16825200  | 1.78095500  |

|   |             |             |             |
|---|-------------|-------------|-------------|
| C | -3.77023100 | -0.87701300 | -1.31393600 |
| H | -1.74877600 | -0.64920300 | -2.03540800 |
| C | -4.67791600 | -0.58411600 | -0.29238300 |
| H | -4.96294300 | 0.39447800  | 1.61614400  |
| H | -4.09526500 | -1.43911300 | -2.19326200 |
| H | -5.71473400 | -0.92230500 | -0.36513800 |
| N | -0.32129500 | 2.15246400  | 0.05858400  |
| O | -1.28753300 | 2.89541900  | 0.10788900  |
| O | 1.82013300  | -2.02691000 | -0.08553900 |

## TS6

|   |             |             |             |
|---|-------------|-------------|-------------|
| C | 1.87262300  | 0.34490200  | 0.08907000  |
| C | 2.62733800  | -0.79958400 | 0.42608900  |
| C | 4.01518600  | -0.77742200 | 0.53075300  |
| C | 4.66068600  | 0.44153600  | 0.28762100  |
| C | 3.93462500  | 1.59325900  | -0.05108500 |
| C | 2.54045100  | 1.55514200  | -0.15762000 |
| C | 0.46589900  | -1.51038900 | 0.54686200  |
| H | 4.56493900  | -1.68205600 | 0.79572300  |
| H | 5.74976200  | 0.49359200  | 0.36503000  |
| H | 4.46366200  | 2.53055500  | -0.23755300 |
| H | 1.98476500  | 2.45232600  | -0.42984400 |
| H | 0.00040200  | -2.20697600 | -0.17427100 |
| C | -0.15696200 | -1.70217700 | 1.92982900  |
| H | -1.23719700 | -1.50419700 | 1.90949900  |
| H | 0.00370500  | -2.73965500 | 2.25926700  |
| H | 0.31341200  | -1.02664500 | 2.66037700  |
| C | 0.48082800  | -0.08049200 | 0.01969100  |
| C | -0.66253600 | 0.79018600  | -0.02835900 |
| C | -2.08996200 | 0.34448400  | 0.03846700  |
| C | -3.03616900 | 1.12340200  | 0.73122000  |
| C | -2.52743400 | -0.83700900 | -0.58787300 |
| C | -4.37087200 | 0.72356700  | 0.80903300  |
| H | -2.72532500 | 2.05083100  | 1.21481700  |
| C | -3.86554200 | -1.23111500 | -0.51320900 |
| H | -1.82995500 | -1.45301600 | -1.15411200 |
| C | -4.79256000 | -0.45582100 | 0.18785200  |
| H | -5.08623300 | 1.34032700  | 1.35875700  |
| H | -4.18378400 | -2.14875900 | -1.01429700 |
| H | -5.83881600 | -0.76587600 | 0.24568600  |
| N | -0.41652100 | 2.08643300  | -0.15122700 |
| O | -1.11530900 | 3.07886000  | -0.26196900 |
| O | 1.85991400  | -1.89428700 | 0.62194800  |
| N | 0.57452500  | -0.52681000 | -2.19960500 |

O 0.27302500 -1.60865200 -2.47164200

E

C 1.82253800 0.25488400 -0.23566200  
C 2.68953500 -0.65951000 0.37819400  
C 4.07081900 -0.46522600 0.38942600  
C 4.56682500 0.67708200 -0.24915800  
C 3.71335600 1.59263300 -0.88227400  
C 2.32983500 1.38087400 -0.88801900  
C 0.62161900 -1.51021200 0.83219700  
H 4.72729800 -1.18439100 0.88178700  
H 5.64517300 0.85640300 -0.25386000  
H 4.13023500 2.47162900 -1.37825400  
H 1.66196200 2.08014900 -1.39383500  
H 0.22384800 -2.42863900 0.37269100  
C 0.06160100 -1.30904100 2.23147600  
H -1.03659900 -1.26162600 2.21706000  
H 0.36454300 -2.15496500 2.86630200  
H 0.44571100 -0.38187200 2.68286700  
C 0.42749500 -0.31909000 -0.15622200  
C -0.69134400 0.66231100 0.13847400  
C -2.12745000 0.32311400 -0.01832200  
C -3.13243600 1.30275700 0.12916600  
C -2.53104800 -0.99592100 -0.31862100  
C -4.47988900 0.97457100 -0.02161700  
H -2.85833400 2.33193800 0.35998100  
C -3.88049900 -1.31860100 -0.46497200  
H -1.79536200 -1.78860000 -0.44426900  
C -4.86314200 -0.33629100 -0.31819900  
H -5.23661200 1.75431700 0.09486400  
H -4.16235100 -2.34849100 -0.69726500  
H -5.91946300 -0.59050600 -0.43430800  
N -0.30542700 1.83606900 0.53346000  
O -0.84393400 2.87503000 0.86556000  
O 2.05363500 -1.71149700 0.93494600  
N 0.24043500 -0.78004500 -1.65119700  
O 0.37504900 -1.94772100 -1.84110300

TS7

C 1.28301600 0.67053300 -0.28865600  
C 2.55759500 0.45508900 0.25469900  
C 3.38973600 1.52041900 0.59913500  
C 2.90984200 2.81649700 0.37712400  
C 1.63910400 3.04321800 -0.17033600

|   |             |             |             |
|---|-------------|-------------|-------------|
| C | 0.80909600  | 1.96477400  | -0.50348800 |
| C | 1.86006500  | -1.63155800 | -0.27748300 |
| H | 4.37788600  | 1.33473100  | 1.02348500  |
| H | 3.54397100  | 3.66878700  | 0.63471600  |
| H | 1.29355400  | 4.06564800  | -0.33765800 |
| H | -0.18434300 | 2.13332100  | -0.92342500 |
| H | 2.24225800  | -1.78680000 | -1.30096700 |
| C | 1.71046300  | -2.98596300 | 0.38622000  |
| H | 0.93559100  | -3.57825500 | -0.12401100 |
| H | 2.66372900  | -3.52984900 | 0.30205300  |
| H | 1.45143800  | -2.90483900 | 1.44894200  |
| C | 0.62861300  | -0.69091000 | -0.48456800 |
| C | -0.59880600 | -0.83730400 | 0.42066200  |
| C | -1.92188400 | -0.18805800 | 0.14955400  |
| C | -2.44519500 | 0.69769700  | 1.11042600  |
| C | -2.68335600 | -0.46412800 | -1.00018200 |
| C | -3.68771900 | 1.30384000  | 0.91979800  |
| H | -1.87316900 | 0.90954600  | 2.01629300  |
| C | -3.92970800 | 0.13972500  | -1.18399500 |
| H | -2.30521100 | -1.15538000 | -1.75209000 |
| C | -4.43374400 | 1.02791300  | -0.23002500 |
| H | -4.07424900 | 1.99386200  | 1.67399300  |
| H | -4.51105700 | -0.09017800 | -2.08041800 |
| H | -5.40803600 | 1.50007000  | -0.37961800 |
| N | -0.39436700 | -1.38063500 | 1.57308600  |
| O | -1.05386700 | -1.58081600 | 2.57818100  |
| O | 2.85935900  | -0.85096400 | 0.41875300  |
| N | 0.12142500  | -0.70433600 | -1.94819500 |
| O | 0.84894900  | -1.19529200 | -2.75304000 |

## F

|   |            |             |             |
|---|------------|-------------|-------------|
| C | 1.38564100 | 0.26348800  | -0.46720600 |
| C | 2.21272700 | 0.64936000  | 0.59654100  |
| C | 3.07185500 | 1.74353900  | 0.49162600  |
| C | 3.08252100 | 2.44208400  | -0.72194200 |
| C | 2.26315000 | 2.06281000  | -1.79551800 |
| C | 1.40496200 | 0.96302500  | -1.67391700 |
| C | 1.17738200 | -1.22446700 | 1.39032300  |
| H | 3.70486900 | 2.03456300  | 1.33153200  |
| H | 3.74706800 | 3.30301800  | -0.83214000 |
| H | 2.29702200 | 2.62627900  | -2.73037900 |
| H | 0.76325100 | 0.65720500  | -2.50314500 |
| H | 1.82298400 | -2.11761800 | 1.31377600  |
| C | 0.17821800 | -1.42003600 | 2.51438800  |

|   |             |             |             |
|---|-------------|-------------|-------------|
| H | -0.42990300 | -2.31796000 | 2.32847800  |
| H | 0.71937800  | -1.56423600 | 3.46152100  |
| H | -0.49591900 | -0.55967200 | 2.62797900  |
| C | 0.63270700  | -0.97037900 | -0.04775300 |
| C | -0.86658200 | -1.00869100 | -0.27216400 |
| C | -1.79779000 | 0.12396600  | -0.05050000 |
| C | -3.12030800 | 0.07990900  | -0.54036400 |
| C | -1.39285000 | 1.27109400  | 0.66474200  |
| C | -3.99697700 | 1.14414600  | -0.32807000 |
| H | -3.46565400 | -0.79197800 | -1.09629800 |
| C | -2.27684400 | 2.32917200  | 0.87884300  |
| H | -0.38193300 | 1.34380100  | 1.06190900  |
| C | -3.58217700 | 2.27365000  | 0.38310400  |
| H | -5.01467400 | 1.08666100  | -0.72210700 |
| H | -1.93819500 | 3.20399100  | 1.43935500  |
| H | -4.27218000 | 3.10411500  | 0.55153800  |
| N | -1.28150300 | -2.16118500 | -0.70664800 |
| O | -2.34544700 | -2.65866000 | -1.02171700 |
| O | 2.05456100  | -0.11099800 | 1.70184100  |
| N | 1.16379900  | -2.07040400 | -1.07934500 |
| O | 1.98013700  | -2.82072700 | -0.66298200 |

## TS8

|   |             |             |             |
|---|-------------|-------------|-------------|
| C | -1.24216000 | -0.65981600 | -0.04124000 |
| C | -2.61734500 | -0.45593800 | 0.21487600  |
| C | -3.55521000 | -1.48156000 | 0.13057500  |
| C | -3.09374200 | -2.75200700 | -0.23451300 |
| C | -1.73769000 | -2.97687000 | -0.51606900 |
| C | -0.80631800 | -1.93736500 | -0.43025400 |
| C | -1.68763200 | 1.59071100  | 0.58346000  |
| H | -4.60805900 | -1.28521500 | 0.33993800  |
| H | -3.80496400 | -3.57885800 | -0.30641300 |
| H | -1.40513200 | -3.97424700 | -0.81269700 |
| H | 0.24062800  | -2.12118500 | -0.66968600 |
| H | -1.80715700 | 2.45346400  | -0.10160100 |
| C | -1.50624400 | 2.10121900  | 2.01174000  |
| H | -0.63460600 | 2.76678500  | 2.08207500  |
| H | -2.40145500 | 2.66688200  | 2.31033300  |
| H | -1.37295700 | 1.26362200  | 2.71357300  |
| C | -0.61051700 | 0.64759800  | 0.06573900  |
| C | 0.79027600  | 0.97146200  | 0.16259200  |
| C | 1.90423200  | -0.02620600 | 0.14563600  |
| C | 2.93098400  | 0.06743200  | -0.80821800 |
| C | 1.96579700  | -1.03573000 | 1.12059900  |

|   |             |             |             |
|---|-------------|-------------|-------------|
| C | 3.99023700  | -0.84232300 | -0.79685100 |
| H | 2.89739200  | 0.85624900  | -1.56296100 |
| C | 3.02949900  | -1.94119400 | 1.13267400  |
| H | 1.17765100  | -1.10899800 | 1.87305400  |
| C | 4.04189900  | -1.84884900 | 0.17277300  |
| H | 4.77939400  | -0.76396600 | -1.54875300 |
| H | 3.06884400  | -2.71967300 | 1.89872300  |
| H | 4.87319600  | -2.55828700 | 0.18274500  |
| N | 1.10393700  | 2.25400600  | 0.23673600  |
| O | 2.15767500  | 2.86352000  | 0.30611400  |
| O | -2.91346300 | 0.82615600  | 0.52182800  |
| N | -0.66945900 | 1.18635200  | -2.05849000 |
| O | -1.09677700 | 2.24751800  | -2.21883800 |

### TS9

|   |             |             |             |
|---|-------------|-------------|-------------|
| C | 1.68692600  | 0.23528200  | -0.29156100 |
| C | 2.88361600  | -0.35502900 | 0.15455400  |
| C | 4.14717500  | 0.17093400  | -0.09688600 |
| C | 4.19329500  | 1.35262600  | -0.83966000 |
| C | 3.01350100  | 1.96562900  | -1.30602700 |
| C | 1.75650600  | 1.42080400  | -1.04278900 |
| H | 5.04837700  | -0.32397100 | 0.26900000  |
| H | 5.16099200  | 1.80712900  | -1.06497500 |
| H | 3.08652400  | 2.88763500  | -1.88789400 |
| H | 0.85062400  | 1.90534600  | -1.41140800 |
| C | 0.62773500  | -0.65072900 | 0.17328300  |
| C | -0.81426700 | -0.48166800 | -0.04218400 |
| C | -1.45541800 | 0.83047800  | 0.19773800  |
| C | -2.53751500 | 1.29733400  | -0.57614800 |
| C | -0.94908300 | 1.66043400  | 1.21894900  |
| C | -3.09290700 | 2.55222800  | -0.32896800 |
| H | -2.94061100 | 0.67124400  | -1.37114500 |
| C | -1.51503100 | 2.91063000  | 1.46772300  |
| H | -0.11050900 | 1.31429000  | 1.82602900  |
| C | -2.58872300 | 3.36230700  | 0.69415800  |
| H | -3.92791900 | 2.90041100  | -0.94197900 |
| H | -1.11462600 | 3.53526800  | 2.27002600  |
| H | -3.03027100 | 4.34340500  | 0.88644100  |
| N | -1.54485100 | -1.48897800 | -0.46583000 |
| O | -1.00771400 | -2.65398400 | -0.81139100 |
| O | 2.61137300  | -1.49887400 | 0.84980600  |
| C | 1.25919100  | -1.66910000 | 0.85458900  |
| C | 0.75541300  | -2.86155100 | 1.58202200  |
| H | 1.35192500  | -3.02939000 | 2.49156100  |

|   |             |             |             |
|---|-------------|-------------|-------------|
| H | -0.29900700 | -2.73603800 | 1.85908100  |
| H | 0.82913800  | -3.76375500 | 0.95172800  |
| H | -1.86617500 | -3.16342400 | -1.02381100 |
| N | -3.16502900 | -1.60289600 | -0.50696700 |
| O | -3.39013200 | -2.74073000 | -0.90789400 |

## G

|   |             |             |             |
|---|-------------|-------------|-------------|
| C | 1.66583700  | 0.29191300  | -0.25088600 |
| C | 2.87190600  | -0.30070000 | 0.16384500  |
| C | 4.12771200  | 0.25143500  | -0.06917700 |
| C | 4.15646000  | 1.46385600  | -0.76166700 |
| C | 2.96722100  | 2.07904600  | -1.19947100 |
| C | 1.71843000  | 1.50704400  | -0.95427500 |
| H | 5.03625800  | -0.24780000 | 0.27182800  |
| H | 5.11743500  | 1.94006700  | -0.97039600 |
| H | 3.02562900  | 3.02432800  | -1.74450100 |
| H | 0.80555800  | 1.99386500  | -1.30144800 |
| C | 0.61595000  | -0.62879300 | 0.17543300  |
| C | -0.81594000 | -0.47566600 | -0.03311600 |
| C | -1.50254500 | 0.80001400  | 0.18007000  |
| C | -2.63542900 | 1.20241700  | -0.56690400 |
| C | -0.99474100 | 1.69633500  | 1.14988500  |
| C | -3.22291800 | 2.44654300  | -0.35272100 |
| H | -3.05007100 | 0.53844300  | -1.32466500 |
| C | -1.59330500 | 2.93630400  | 1.36407700  |
| H | -0.12891700 | 1.40347600  | 1.74615300  |
| C | -2.71023500 | 3.31989600  | 0.61434700  |
| H | -4.09143500 | 2.73886400  | -0.94819900 |
| H | -1.18742400 | 3.60614400  | 2.12628400  |
| H | -3.17965500 | 4.29229200  | 0.78241700  |
| N | -1.53021900 | -1.57215700 | -0.43951900 |
| O | -0.88866500 | -2.63387500 | -0.98683400 |
| O | 2.61997400  | -1.48097300 | 0.80403800  |
| C | 1.27052000  | -1.66967000 | 0.80909900  |
| C | 0.79116900  | -2.90390800 | 1.48064500  |
| H | -0.26492000 | -2.81171600 | 1.76572400  |
| H | 0.88337900  | -3.77647100 | 0.81202800  |
| H | 1.39091400  | -3.09995100 | 2.38253200  |
| H | -1.71136800 | -3.20630100 | -1.15131200 |
| N | -2.87332400 | -1.72044500 | -0.30797300 |
| O | -3.24145000 | -2.81557900 | -0.78084300 |

## TS10

|   |            |            |            |
|---|------------|------------|------------|
| C | 1.69262000 | 0.40754700 | 0.01657100 |
|---|------------|------------|------------|



|   |             |             |             |
|---|-------------|-------------|-------------|
| C | 2.90980200  | -0.29487600 | 0.06176100  |
| C | 4.16236100  | 0.30874300  | 0.05097400  |
| C | 4.18326500  | 1.70422400  | 0.00206300  |
| C | 2.98659100  | 2.44223100  | -0.02776100 |
| C | 1.74046000  | 1.81180500  | -0.02035000 |
| H | 5.07444600  | -0.28928900 | 0.08547600  |
| H | 5.14216500  | 2.22797500  | -0.00724600 |
| H | 3.03169600  | 3.53350900  | -0.05602400 |
| H | 0.82865100  | 2.40682800  | -0.03875300 |
| C | 0.64157900  | -0.62103700 | 0.04987100  |
| C | -0.76175000 | -0.44426000 | 0.04247600  |
| C | -1.48841400 | 0.85485900  | 0.03908700  |
| C | -1.42203400 | 1.69611000  | -1.08796000 |
| C | -2.29861600 | 1.24033200  | 1.12298000  |
| C | -2.13312200 | 2.89785300  | -1.12273600 |
| H | -0.81390800 | 1.39707300  | -1.94501200 |
| C | -3.00941500 | 2.44252200  | 1.08442900  |
| H | -2.36886000 | 0.58994200  | 1.99618600  |
| C | -2.92722800 | 3.27541000  | -0.03528900 |
| H | -2.07296200 | 3.53752400  | -2.00705000 |
| H | -3.63046300 | 2.73030000  | 1.93657800  |
| H | -3.48500800 | 4.21494700  | -0.06308300 |
| N | -1.58030700 | -1.59770500 | -0.01571600 |
| O | -2.41979700 | -1.86765100 | 1.03666100  |
| O | 2.68633900  | -1.63937300 | 0.13839300  |
| C | 1.33954700  | -1.84344600 | 0.14815600  |
| C | 0.91682400  | -3.26201700 | 0.29330400  |
| H | 0.03734500  | -3.35590100 | 0.94601800  |
| H | 0.64929100  | -3.71127500 | -0.67819600 |
| H | 1.74545800  | -3.84134800 | 0.72473500  |
| H | -2.90412500 | -2.64959100 | 0.63237700  |
| N | -1.66367800 | -2.39428800 | -1.05798000 |
| O | -2.48162400 | -3.31082000 | -0.88950300 |

## H

|   |             |             |             |
|---|-------------|-------------|-------------|
| C | -1.57247800 | -0.44698000 | -0.25121400 |
| C | -2.82292700 | 0.00290100  | 0.20913800  |
| C | -4.02468700 | -0.64907600 | -0.04880800 |
| C | -3.94921400 | -1.81331200 | -0.81649800 |
| C | -2.71356000 | -2.28620400 | -1.30052300 |
| C | -1.52036100 | -1.61618400 | -1.02867800 |
| H | -4.97133000 | -0.25952900 | 0.32944200  |
| H | -4.86431400 | -2.36338100 | -1.04848000 |
| H | -2.69102400 | -3.19718600 | -1.90355300 |

|   |             |             |             |
|---|-------------|-------------|-------------|
| H | -0.57035900 | -1.99290900 | -1.41170200 |
| C | -0.60843700 | 0.53764400  | 0.22753300  |
| C | 0.83356500  | 0.52779200  | 0.00650700  |
| C | 1.63475200  | -0.68325100 | 0.18096600  |
| C | 2.81738100  | -0.94816900 | -0.55283300 |
| C | 1.19563800  | -1.66262600 | 1.10451700  |
| C | 3.51489600  | -2.13972100 | -0.36989400 |
| H | 3.18298500  | -0.21689700 | -1.27181600 |
| C | 1.90410100  | -2.84797200 | 1.28643500  |
| H | 0.29380400  | -1.47743800 | 1.69025800  |
| C | 3.06760200  | -3.09576300 | 0.54984200  |
| H | 4.41962800  | -2.32528400 | -0.95439800 |
| H | 1.54719300  | -3.58275000 | 2.01246900  |
| H | 3.62288100  | -4.02613700 | 0.69191200  |
| N | 1.40795500  | 1.69612400  | -0.40771900 |
| O | 2.74524000  | 1.87996300  | -0.34614200 |
| O | -2.67209000 | 1.15823500  | 0.92291000  |
| C | -1.34720600 | 1.47127400  | 0.92943100  |
| C | -0.97383300 | 2.70639400  | 1.66301700  |
| H | 0.07664700  | 2.67247300  | 1.98182100  |
| H | -1.09802600 | 3.59364500  | 1.01899800  |
| H | -1.61489100 | 2.82882200  | 2.54883800  |
| H | 2.75464900  | 2.83644100  | -0.69864400 |
| N | 0.70915200  | 2.76232500  | -0.89610200 |
| O | 1.48697800  | 3.70686600  | -1.15077000 |

## TS11

|   |             |             |             |
|---|-------------|-------------|-------------|
| C | -1.54403100 | -0.48403600 | -0.28267000 |
| C | -2.79551100 | -0.11812700 | 0.24638800  |
| C | -3.98074900 | -0.79030900 | -0.03564200 |
| C | -3.88668900 | -1.88440000 | -0.89875200 |
| C | -2.64948400 | -2.27281900 | -1.44964400 |
| C | -1.47272000 | -1.58428600 | -1.15368400 |
| H | -4.92954100 | -0.46846400 | 0.39702100  |
| H | -4.78879600 | -2.44590400 | -1.15316300 |
| H | -2.61308100 | -3.13103000 | -2.12508000 |
| H | -0.52098800 | -1.89426400 | -1.58954200 |
| C | -0.60425900 | 0.48832500  | 0.25581100  |
| C | 0.84276100  | 0.54880000  | -0.00456600 |
| C | 1.68492300  | -0.65394200 | 0.17672700  |
| C | 2.87730900  | -0.87336500 | -0.54767400 |
| C | 1.27055400  | -1.63869600 | 1.09927400  |
| C | 3.61597100  | -2.04043900 | -0.35599900 |
| H | 3.22029700  | -0.12996500 | -1.26478400 |

|   |              |              |              |
|---|--------------|--------------|--------------|
| C | 2. 02245700  | -2. 79603900 | 1. 29646300  |
| H | 0. 35350700  | -1. 48570000 | 1. 67042900  |
| C | 3. 19760900  | -3. 00403200 | 0. 56776900  |
| H | 4. 53077500  | -2. 19685500 | -0. 93311000 |
| H | 1. 68735500  | -3. 54028700 | 2. 02308200  |
| H | 3. 78541600  | -3. 91286400 | 0. 71905600  |
| N | 1. 31550100  | 1. 70585800  | -0. 39882100 |
| O | 2. 60338700  | 1. 95698100  | -0. 58314600 |
| O | -2. 66093100 | 0. 97468700  | 1. 05408800  |
| C | -1. 34533000 | 1. 33236800  | 1. 05158100  |
| C | -0. 99068600 | 2. 50854900  | 1. 88427400  |
| H | -1. 53839200 | 2. 47759100  | 2. 83879000  |
| H | 0. 08803000  | 2. 53561800  | 2. 08419600  |
| H | -1. 25440400 | 3. 44302600  | 1. 36187800  |
| H | 2. 52897100  | 2. 92458600  | -0. 90502100 |
| N | 0. 43590600  | 3. 02318300  | -0. 83956300 |
| O | 1. 27482500  | 3. 85532100  | -1. 16506700 |

*(E)*-2a

|   |              |              |              |
|---|--------------|--------------|--------------|
| C | 1. 37200500  | -0. 40075800 | -0. 25866700 |
| C | 2. 70294500  | -0. 12436900 | 0. 10973200  |
| C | 3. 73669900  | -1. 05335500 | 0. 03561500  |
| C | 3. 40284700  | -2. 32322600 | -0. 44020700 |
| C | 2. 08283600  | -2. 63055600 | -0. 82471700 |
| C | 1. 06076800  | -1. 68452300 | -0. 74130500 |
| H | 4. 75344200  | -0. 79078600 | 0. 33320300  |
| H | 4. 17874300  | -3. 08874100 | -0. 51802300 |
| H | 1. 85606300  | -3. 63260300 | -1. 19730000 |
| H | 0. 04358600  | -1. 93799300 | -1. 04417700 |
| C | 0. 64574800  | 0. 84185900  | -0. 03685600 |
| C | -0. 78478600 | 1. 10464500  | -0. 29379300 |
| C | -1. 78273100 | 0. 04490500  | 0. 04392700  |
| C | -1. 64525500 | -0. 67361500 | 1. 24520500  |
| C | -2. 85231000 | -0. 27317300 | -0. 81369400 |
| C | -2. 55767600 | -1. 67330300 | 1. 58862100  |
| H | -0. 81519100 | -0. 44191900 | 1. 91634500  |
| C | -3. 75250700 | -1. 28544300 | -0. 47682800 |
| H | -2. 97491400 | 0. 27702300  | -1. 74617700 |
| C | -3. 61267500 | -1. 98506500 | 0. 72637400  |
| H | -2. 43989600 | -2. 21458100 | 2. 53082900  |
| H | -4. 57278800 | -1. 52698400 | -1. 15777400 |
| H | -4. 32364800 | -2. 77241400 | 0. 98995900  |
| N | -1. 05874100 | 2. 27166300  | -0. 77776800 |
| O | -2. 41309300 | 2. 51979900  | -0. 93063700 |

|   |             |            |             |
|---|-------------|------------|-------------|
| O | 2.81408700  | 1.16774700 | 0.53134700  |
| C | 1.57509600  | 1.73984300 | 0.43627800  |
| C | 1.49090700  | 3.16138600 | 0.85810000  |
| H | 1.95654400  | 3.82160700 | 0.10617300  |
| H | 0.44343400  | 3.46693000 | 0.96355100  |
| H | 2.02817800  | 3.31163100 | 1.80827500  |
| H | -2.42178900 | 3.41531700 | -1.29289400 |

(Z)-6a

|   |             |             |             |
|---|-------------|-------------|-------------|
| C | -2.33282500 | -0.97702100 | -0.44732800 |
| C | -3.44419800 | 0.00459600  | -0.29318500 |
| C | -4.78475000 | -0.43039800 | -0.28533200 |
| C | -3.18134800 | 1.38158100  | -0.17504500 |
| C | -5.82764500 | 0.48568500  | -0.16437100 |
| H | -4.99096100 | -1.49793200 | -0.37455600 |
| C | -4.23171600 | 2.29691000  | -0.05671900 |
| H | -2.15132600 | 1.74284900  | -0.19495800 |
| C | -5.55636600 | 1.85487700  | -0.04875100 |
| H | -6.86153400 | 0.13032800  | -0.15581700 |
| H | -4.00820200 | 3.36358600  | 0.02660000  |
| H | -6.37583700 | 2.57173400  | 0.04843400  |
| N | -2.63791700 | -2.11967800 | -0.95695300 |
| O | -1.56094600 | -2.97913200 | -1.07319800 |
| H | -1.95527900 | -3.76107500 | -1.48175900 |
| C | -0.40221500 | -0.84352100 | 1.38859800  |
| C | 0.92758000  | -0.02393900 | 1.36037000  |
| C | -0.95008500 | -0.60003200 | -0.02715400 |
| C | -0.05837200 | -0.01020800 | -0.83067600 |
| H | -0.20803900 | 0.23533000  | -1.88284800 |
| H | 1.75705700  | -0.54925800 | 1.84875200  |
| C | -1.34919800 | -0.32806400 | 2.48743200  |
| H | -2.29590200 | -0.89100300 | 2.49803000  |
| H | -0.88015400 | -0.44698600 | 3.47825200  |
| H | -1.59247000 | 0.73666300  | 2.35059600  |
| C | -0.12982600 | -2.34498600 | 1.62141100  |
| H | -1.05500800 | -2.93453700 | 1.54227700  |
| H | 0.58224800  | -2.73875000 | 0.88331500  |
| H | 0.29149900  | -2.49729500 | 2.62923200  |
| H | 0.77611900  | 0.92379100  | 1.89894000  |
| C | 1.25099400  | 0.29476800  | -0.13107100 |
| C | 2.36158400  | -0.52833300 | -0.80360300 |
| C | 1.61222700  | 1.77883200  | -0.27997100 |
| O | 0.84258300  | 2.64487700  | -0.61356500 |
| O | 2.69483800  | -0.34682600 | -1.94935200 |

|   |             |              |              |
|---|-------------|--------------|--------------|
| O | 2. 88752100 | -1. 47839200 | -0. 01891300 |
| O | 2. 88589300 | 2. 00428200  | 0. 07488500  |
| C | 3. 35608600 | 3. 36345400  | 0. 00371400  |
| H | 2. 73596200 | 3. 98825100  | 0. 66699700  |
| H | 3. 20746800 | 3. 73448000  | -1. 02286200 |
| C | 4. 81492400 | 3. 37604200  | 0. 40852900  |
| H | 5. 20682000 | 4. 40422400  | 0. 36700600  |
| H | 4. 94351400 | 2. 99883800  | 1. 43488500  |
| H | 5. 41606600 | 2. 74948500  | -0. 26806900 |
| C | 3. 90740600 | -2. 30850200 | -0. 60783200 |
| H | 4. 72150100 | -1. 66110900 | -0. 97078000 |
| H | 3. 48323800 | -2. 81675300 | -1. 48862500 |
| C | 4. 38299100 | -3. 28832300 | 0. 44380100  |
| H | 3. 55828400 | -3. 92941000 | 0. 79141200  |
| H | 5. 16838800 | -3. 93562500 | 0. 02338600  |
| H | 4. 80136600 | -2. 76105700 | 1. 31507000  |

(E)-6a

|   |              |              |              |
|---|--------------|--------------|--------------|
| C | -2. 29346200 | -1. 12995700 | -0. 32436900 |
| C | -3. 36720600 | -0. 09372200 | -0. 29645200 |
| C | -3. 02963800 | 1. 24543000  | -0. 58078600 |
| C | -4. 70818400 | -0. 39637200 | 0. 01777500  |
| C | -4. 00469400 | 2. 24468100  | -0. 56947500 |
| H | -1. 99477200 | 1. 50752400  | -0. 81045300 |
| C | -5. 67406700 | 0. 61071500  | 0. 04567600  |
| H | -4. 98933700 | -1. 42326400 | 0. 24201300  |
| C | -5. 33005600 | 1. 93254100  | -0. 25453800 |
| H | -3. 72266400 | 3. 27447800  | -0. 80313100 |
| H | -6. 70704900 | 0. 35838100  | 0. 29954500  |
| H | -6. 09215400 | 2. 71621200  | -0. 24007800 |
| N | -2. 39593600 | -2. 36857500 | -0. 66750300 |
| O | -3. 66640600 | -2. 76372900 | -1. 05577200 |
| H | -3. 52601700 | -3. 68315500 | -1. 31677200 |
| C | -0. 42977400 | -0. 59577200 | 1. 51177500  |
| C | 1. 11340800  | -0. 45995500 | 1. 32558000  |
| C | -0. 90201600 | -0. 73644700 | 0. 05639000  |
| C | 0. 06631400  | -0. 46348100 | -0. 82533000 |
| H | -0. 03558800 | -0. 47630200 | -1. 91140600 |
| H | 1. 56479100  | 0. 24649700  | 2. 03790800  |
| C | -0. 77847300 | -1. 84610300 | 2. 33861100  |
| H | -1. 86662100 | -1. 94004100 | 2. 48096100  |
| H | -0. 31329600 | -1. 78905500 | 3. 33687600  |
| H | -0. 42595500 | -2. 76388600 | 1. 84303000  |
| C | -1. 02431900 | 0. 65375800  | 2. 19659900  |

|   |             |             |             |
|---|-------------|-------------|-------------|
| H | -2.12044900 | 0.58966000  | 2.26820300  |
| H | -0.77663900 | 1.57311900  | 1.64617900  |
| H | -0.62630300 | 0.74482600  | 3.22121100  |
| H | 1.59638400  | -1.43158000 | 1.48852400  |
| C | 1.35924200  | -0.04567000 | -0.15580400 |
| C | 2.55687300  | -0.69518900 | -0.86534400 |
| C | 1.54249500  | 1.48061300  | -0.27284200 |
| O | 0.67490100  | 2.26681100  | -0.56341000 |
| O | 2.77581600  | -0.53029500 | -2.04113700 |
| O | 3.30991500  | -1.46444800 | -0.07028100 |
| O | 2.79561600  | 1.84003800  | 0.04230300  |
| C | 3.11147900  | 3.24453700  | -0.01452800 |
| H | 2.45993000  | 3.78226200  | 0.69329300  |
| H | 2.87311400  | 3.61843800  | -1.02286200 |
| C | 4.57803500  | 3.40887400  | 0.32331900  |
| H | 4.85237100  | 4.47479300  | 0.29192000  |
| H | 4.79683800  | 3.02577500  | 1.33202400  |
| H | 5.21079500  | 2.86814500  | -0.39706700 |
| C | 4.44378200  | -2.10978600 | -0.68030900 |
| H | 5.09534600  | -1.33628600 | -1.11763100 |
| H | 4.08788100  | -2.73851300 | -1.51223000 |
| C | 5.15296900  | -2.91883900 | 0.38493400  |
| H | 4.48819200  | -3.68932900 | 0.80512000  |
| H | 6.03112600  | -3.42160600 | -0.04933100 |
| H | 5.49664400  | -2.27320600 | 1.20775200  |

## TS12

|   |             |             |             |
|---|-------------|-------------|-------------|
| C | 0.85903700  | 0.98412500  | -0.30132800 |
| N | 1.20852500  | 2.05306100  | -0.86316400 |
| O | 1.57273700  | 3.16719300  | -1.45047500 |
| C | -1.41749900 | -0.41078600 | -0.27746400 |
| C | -2.69615200 | -0.10602300 | 0.23169600  |
| C | -3.80013900 | -0.94396500 | 0.10010500  |
| C | -3.59577300 | -2.14533000 | -0.58246500 |
| C | -2.33135000 | -2.47764300 | -1.10846000 |
| C | -1.23727400 | -1.62398100 | -0.96573400 |
| H | -4.77228600 | -0.66604400 | 0.51136600  |
| H | -4.43130000 | -2.83764500 | -0.71196000 |
| H | -2.20744000 | -3.42477900 | -1.63944700 |
| H | -0.26246900 | -1.89386900 | -1.37660300 |
| C | -0.58098900 | 0.72968300  | 0.06405000  |
| C | 1.87102700  | -0.08529200 | 0.04174000  |
| C | 3.13757500  | -0.05228600 | -0.56685100 |
| C | 1.60496600  | -1.09276400 | 0.98402700  |

|   |             |             |             |
|---|-------------|-------------|-------------|
| C | 4.10794800  | -1.00218600 | -0.25157700 |
| H | 3.34559500  | 0.73912600  | -1.29122600 |
| C | 2.58080800  | -2.04083700 | 1.30851600  |
| H | 0.63149600  | -1.13152000 | 1.47655500  |
| C | 3.83294200  | -2.00184800 | 0.69016000  |
| H | 5.08543200  | -0.96505900 | -0.74006300 |
| H | 2.35972500  | -2.81295600 | 2.05025200  |
| H | 4.59375300  | -2.74572500 | 0.94077500  |
| O | -2.67827200 | 1.11028900  | 0.84635500  |
| C | -1.40212600 | 1.60098700  | 0.73243200  |
| C | -1.16593000 | 2.93237700  | 1.35137600  |
| H | -0.11588700 | 3.22972800  | 1.23399900  |
| H | -1.80695400 | 3.70341800  | 0.89037600  |
| H | -1.40866500 | 2.91479100  | 2.42713300  |
| H | 0.77117600  | 3.71386700  | -1.59738300 |
